## Osteocytes regulate organismal senescence of bone and bone marrow

Peng Ding<sup>1†</sup>, Chuan Gao<sup>1†</sup>, Youshui Gao<sup>1†</sup>, Delin Liu<sup>2,3</sup>, Hao Li<sup>1</sup>, Jun Xu<sup>1</sup>, Xiaoyi Chen<sup>4</sup>, Yigang Huang<sup>1</sup>, Changqing Zhang<sup>1\*</sup>, Minghao Zheng<sup>2,3\*</sup>, Junjie Gao<sup>1,5\*</sup>

<sup>1</sup>Department of Orthopaedics, Shanghai Jiao Tong University Affiliated Sixth People's Hospital, Shanghai, 200233, China.

<sup>2</sup>Centre for Orthopaedic Translational Research, Medical School, University of Western Australia, Nedlands, Western Australia 6009, Australia.

<sup>3</sup>Perron Institute for Neurological and Translational Science, Nedlands, Western Australia 6009, Australia.

<sup>4</sup>Ningbo Institute of Life and Health Industry, University of Chinese Academy of Sciences.

<sup>5</sup>Institute of Microsurgery on Extremities, Shanghai Jiao Tong University Affiliated Sixth People's Hospital, Shanghai, 200233, China.

### Corresponding Author

\*To whom correspondence should be addressed:

Junjie Gao: [colingjj@163.com](mailto:colingjj@163.com)

Minghao Zheng: [minghao.zheng@uwa.edu.au](mailto:minghao.zheng@uwa.edu.au)

Changqing Zhang: [zhangcq@sjtu.edu.cn](mailto:zhangcq@sjtu.edu.cn)

### Abstract

The skeletal system contains a series of sophisticated cellular lineages arisen from the mesenchymal stem cells (MSC) and hematopoietic stem cells (HSC), that determine the homeostasis of bone and bone marrow. Here we reasoned that osteocyte may exert a function in regulation of these lineage cell specifications and tissue homeostasis. Using a mouse model of conditional deletion of osteocytes by the expression of diphtheria toxin subunit  $\alpha$  (DTA) in dentin matrix protein 1 (DMP-1) positive osteocytes, we demonstrated that partial ablation of DMP-1 positive osteocytes caused severe sarcopenia, osteoporosis and degenerative kyphosis, leading to shorter lifespan in these animals. Osteocyte reduction altered mesenchymal lineage commitment resulting in impairment of osteogenesis and induction of osteoclastogenesis. Single cell RNA sequencing further revealed that hematopoietic lineage was mobilized towards myeloid lineage differentiation with expanded myeloid progenitors, neutrophils and monocytes, while the lymphopoiesis was impaired with reduced B cells in the osteocyte ablation mice. The acquisition of a senescence-associated secretory phenotype (SASP) in both osteoprogenic and myeloid lineage cells was the underlying cause. Together, we showed that osteocytes play critical roles in regulating of lineage cell specifications in bone and bone marrow through mediation of organismal senescence.

**Key words:** Osteocytes, SASP, osteogenesis, osteoclastogenesis, myelopoiesis

45 † These authors contributed equally, \*Correspondence

46

## 47 **Introduction**

48 The skeletal system is an elaborate organ mainly containing bone, bone marrow and  
49 other connective tissues, whose function includes movement, support, hematopoiesis,  
50 immune responses and endocrine regulation(Karsenty and Ferron 2012; Katsnelson  
51 2010; Quarles 2011). The skeletal system hosts at least more than 12 types of cell  
52 lineage differentiations arisen from the hematopoietic stem cells (HSC) and  
53 mesenchymal stem cells (MSC)(Mendez-Ferrer et al. 2010). During hematopoiesis,  
54 HSCs give rise to lymphoid and myeloid lineage cells including B cell, neutrophil and  
55 monocytes as well as osteoclasts. Meanwhile, MSCs differentiate into osteoblastic  
56 lineage cells, bone marrow adipocytes and form fibroconnective tissues. The  
57 sophisticated processes of differentiation and interaction of these cell lineages are  
58 critical not only to skeletal development, but also to the integrity of hematopoietic,  
59 immune and endocrine systems(Mendez-Ferrer, et al. 2010; Le, Andreeff, and Battula  
60 2018; Yu and Scadden 2016). During aging, these cell lineage commitments change  
61 rigorously and cause imbalance between myeloid-lymphoid hematopoiesis and adipo-  
62 osteogenic differentiation (Chen et al. 2016; Sinha et al. 2022), which lead to the  
63 increased myelopoiesis and adipogenesis as opposed to lymphopoiesis and  
64 osteogenesis. While the complex communications between these cell lineages have  
65 been documented, it is still unclear what determine these cell lineages to survive and  
66 how their cell fates are maintained during development and aging. It has been  
67 speculated that cellular senescence, characterized by cell proliferation arrest, altered  
68 metabolism and apoptosis resistance(Gorgoulis et al. 2019; Tchkonina et al. 2013), may  
69 be responsible for the regulation of lineage cell fates. However, the precise role in  
70 aging and age-related diseases remain unclear.

71

72 Osteocytes, as the long living terminally differentiated cells and the most abundant  
73 cells within the bone matrix(Tresguerres et al. 2020), play vital roles in maintaining  
74 the skeletal homeostasis. Apart from mechanical transduction(Long 2011; Sato et al.  
75 2020), osteocytes have been shown to regulate bone formation, bone resorption, bone  
76 marrow hematopoiesis(Asada et al. 2013; Azab et al. 2020; Fulzele et al. 2013; Xiao  
77 et al. 2021) and generate endocrine signals to mediate function of other  
78 organs(Razzaque 2009; Fulzele et al. 2017; Cain et al. 2012). Here we hypothesize  
79 that osteocytes, may exert another important role in regulation of lineage cell fate  
80 specifications, and harmonization of bone and bone marrow through mediation of  
81 organismal senescence. Using a mouse model of conditional deletion of osteocytes by  
82 the expression of diphtheria toxin subunit  $\alpha$  (DTA) in dentin matrix protein 1 (DMP-  
83 1) positive osteocytes, we showed that osteocytes regulated organismal senescence of  
84 bone and bone marrow resulted in skeletal premature aging including severe  
85 sarcopenia, osteoporosis and kyphosis. Deletion of DMP-1 positive osteocytes in  
86 mouse impaired osteogenesis, increased osteoclastogenesis and myelopoiesis. HSCs  
87 were mobilized towards myeloid lineage differentiation with expanded myeloid  
88 progenitors, neutrophils and monocytes, while the lymphopoiesis was impaired with  
89 reduced B cells. Together, we demonstrated that osteocyte played a critical role in  
90 regulation of the HSC and MSC lineage cell differentiations by modification of

91 organismal senescence.

92

## 93 **Results**

### 94 **Mice with less osteocytes have severe osteoporosis, kyphosis, sarcopenia and** 95 **shorter lifespan**

96 To delineate the role of osteocyte in skeletal tissue development and maturation, we  
97 established a mouse model based on diphtheria toxin subunit  $\alpha$ -mediated cell  
98 knockout using the promoter of DMP-1 (Breitman et al. 1990). The latter is a protein  
99 highly expressed in late stage osteocytes but has been shown not to be essential for  
100 early skeletal development (Feng et al. 2003). The results showed that complete  
101 ablation of DMP-1 positive osteocytes (osteocyte<sup>DMP-1</sup>) in DMP-1<sup>cre</sup> DTA<sup>fl/fl</sup> mice  
102 (DTA<sup>ho</sup>) caused lethality of mice before birth. This has led us to investigate the impact  
103 of partial ablation of osteocytes using DMP-1<sup>cre</sup> DTA<sup>fl/+</sup> mice (DTA<sup>het</sup>). As shown in  
104 Figure 1A and B, DTA<sup>het</sup> mice had more empty lacunae without the presence of  
105 osteocytes within cortical and trabecular bone matrix as compared to WT mice.  
106 Further, reduced dendrites were also observed in residual osteocytes of DTA<sup>het</sup> mice  
107 (Figure 1C and D), indicating that the impairment of osteocyte network. Interestingly,  
108 Alizarin red/Alcian blue staining of whole mount skeleton at E19.0 showed no  
109 apparent differences of craniofacial, long bones or spines between WT and DTA<sup>het</sup>  
110 mice (Figure 2 - figure supplement 1). Together, these results indicated that although  
111 there was partial ablation of osteocyte<sup>DMP-1</sup> in DTA<sup>het</sup> mice, the embryonic  
112 development of skeletal tissue appeared to be normal.

113

114 Next, we investigated if reduction of osteocyte<sup>DMP-1</sup> in DTA<sup>het</sup> mice had an impact of  
115 postnatal maturation of bone tissue. Micro-computed tomography ( $\mu$ CT) examination  
116 of the appendicular skeleton revealed a significant decrease in femur bone mineral  
117 density (BMD), bone volume fraction (BV/TV), trabecular number (Tb.N) and  
118 trabecular thickness (Tb.Th), as well as greater trabecular separation (Tb.Sp) in  
119 DTA<sup>het</sup> mice as compared to those in WT mice at 4 weeks (Figure 2A and B).  
120 Moreover, ablation of osteocytes also led to cortical bone loss with decreased cortical  
121 thickness (Ct.Th) and increased cortical porosity (Ct.Po) (Figure 2A and C). At 13  
122 weeks, DTA<sup>het</sup> mice exhibited more bone loss in both trabecular and cortical bone  
123 compared to those in WT mice (Figure 2D-G). The progressive bone loss was  
124 observed through the life of DTA<sup>het</sup> mice. The phenotype observed is unique and  
125 gender insensitive (Figure 2 - figure supplement 2A-C). Similarly,  $\mu$ CT observation  
126 of axial skeleton also revealed the significant bone loss in vertebral bodies (Fig 2H  
127 and I, Figure 2 - figure supplement 2D and E). Furthermore, there was no increase of  
128 bone mass of vertebral bodies from 4 to 13 weeks in DTA<sup>het</sup> mice (Figure 2H and I),  
129 suggesting retardation of vertebral body maturation. At 13 weeks, obvious kyphosis  
130 occurred in DTA<sup>het</sup> mice (Figure 2L) due to severe osteoporosis and vertebral body  
131 compression. Whole-body  $\mu$ CT scan revealed that there was giant increase of thoracic  
132 and lumbar curvature of DTA<sup>het</sup> mice (Figure 2M). At the age of 20 weeks almost all  
133 of DTA<sup>het</sup> mice developed severe kyphosis (Figure 2N). In consistent with  
134 development of kyphosis, gait analysis revealed that DTA<sup>het</sup> mice at 4 weeks have

135 abnormal steps when running (Figure 2 - figure supplement 3A and B). The front and  
136 hind stride length were much shorter in DTA<sup>het</sup> mice (Figure 2 - figure supplement  
137 3C). Also, the swing speed of DTA<sup>het</sup> mice was much slower than WT mice (Figure 2  
138 - figure supplement 3D, Movie supplement 1-6).

139

140 Whole body examination of DTA<sup>het</sup> mice revealed there was a continual body weight  
141 loss and muscle weight loss (Figure 3A, B and C) from 4 weeks. Histology  
142 examination of gastrocnemius muscles revealed focal muscle atrophy with mild  
143 inflammation at 4 weeks (Figure 3D and E). No muscle fibrosis was observed. Many  
144 myonuclei were mispositioned and became centralized as contrast to those in WT  
145 mice. At 13 weeks, there was continual muscle atrophy, rimmed vacuoles and  
146 inclusion bodies were seen within the muscle fibers (Figure 3F-G). Together these  
147 results suggested that DTA<sup>het</sup> mice had systemic muscle atrophy and sarcopenia.  
148 Subsequently, the average lifespan of DTA<sup>het</sup> mice was about 20-40 weeks, which was  
149 much shorter than WT mice (Figure 3H). Together, these data demonstrated that  
150 osteocytes ablation caused severe osteoporosis and kyphosis, as well as sarcopenia.  
151 These premature aging phenotypes have resulted in shortened lifespan.

152

### 153 **Ablation of osteocytes alters mesenchymal lineage commitment and promoted** 154 **osteoclastogenesis**

155 To explore the potential mechanism on why reduction of osteocytes has caused severe  
156 osteoporosis and kyphosis, RNA sequencing was performed on whole bone with bone  
157 marrow flushed out from DTA<sup>het</sup> and WT mice at 4 weeks. Selected skeleton related  
158 gene ontology (GO) analysis revealed that downregulated genes by osteocyte ablation  
159 were enriched in ossification, osteoblast differentiation, positive regulation of  
160 osteoblast differentiation, endochondral ossification and bone morphogenesis (Figure  
161 4 - figure supplement 1A and Supplementary file table 1). Heatmap of significantly  
162 differentiated genes (fold change > 2.0-fold, WT average FPKM > 10, FDR < 0.05)  
163 and subsequent RT-qPCR verified that genes that are critical for osteogenesis,  
164 including *Alp*, *Ocn*, *Colla1*, *Opn*, *Osx* and *Runx2*, were affected by the ablation of  
165 osteocytes (Figure 4 - figure supplement 1B and C). In addition, numbers of  
166 osteoblasts and osteoid surface were remarkably reduced in DTA<sup>het</sup> mice compared to  
167 WT (Figure 4A and B). Also, bone marrow fat accumulation in DTA<sup>het</sup> mice was  
168 observed (Figure 4C and D). Together these results suggested that DTA<sup>het</sup> mice  
169 displayed increased adipogenesis and decreased osteogenesis. To further evaluate the  
170 dynamics of bone formation in DTA<sup>het</sup> mice, a 7-day dynamic histomorphometric  
171 analysis using calcein labeling was performed. The result showed that mineralized  
172 surface, mineral apposition rate (MAR) and bone formation rate (BFR) were  
173 significantly decreased in DTA<sup>het</sup> mice (Figure 4E and F). Serum procollagen type 1  
174 N-terminal propeptide (PINP), a bone formation index, was also reduced after  
175 osteocyte ablation (Figure 4G). Meanwhile, *in vitro* osteogenesis showed there were  
176 less osteogenesis and mineralization in DTA<sup>het</sup> mice compared to WT (Figure 4H and  
177 I), and the mRNA level of osteogenic markers including *Alp*, *Ocn*, *Runx2* was also  
178 decreased (Figure 4J).

179

180 In the aspect of osteoclastogenesis, histomorphometric analysis revealed that  
181 osteoclasts numbers and surface were significantly increased after osteocytes deletion  
182 (Figure 4K and L). Circulatory RANKL was also increased in DTA<sup>het</sup> mice (Figure  
183 4M). In contrast, circulatory osteoprotegrin (OPG), a decoy receptor of RANKL, was  
184 decreased, leading to the elevated ratio of RANKL/OPG (Figure 4M). Serum collagen  
185 type I c-telopeptide (CTX), a bone resorption index, was also significantly augmented  
186 in DTA<sup>het</sup> mice compared to WT mice (Figure 4N), which implicated a high level of  
187 osteoclast activity of DTA<sup>het</sup> mice in vivo. To assess the effects on osteoclasts after  
188 osteocyte ablation, bone marrow derived macrophages (Bmms) were collected  
189 respectively from DTA<sup>het</sup> and WT mice and osteoclast differentiation was induced in  
190 vitro. The number of osteoclasts was substantially increased in DTA<sup>het</sup> mice (Figure  
191 4O and P). Also, the expression of the signature genes of osteoclasts including  
192 TRACP, Calcr, OC-stamp at the mRNA level was significantly upregulated in DTA<sup>het</sup>  
193 mice (Figure 4Q). Together, osteocytes ablation impaired osteogenesis and promoted  
194 osteoclastogenesis.

195

#### 196 **Alteration of hematopoietic lineage commitment by osteocyte ablation**

197 As a part of the skeletal system, bone marrow has its vital functions in maintaining  
198 bone homeostasis (Divieti Pajevic and Krause 2019; Fulzele, et al. 2013; Asada, et al.  
199 2013). HSCs give rise to lymphoid and myeloid lineage cells to establish the  
200 hematopoietic and immune system. To gain a full insight into the role of osteocyte in  
201 bone marrow homeostasis, single cell RNA sequencing (scRNA-seq) was performed  
202 using 10× Genomics Chromium platform. After rigorous quality control, gene  
203 expression data from 26562 cells (13835 and 12727 cells from 4-week littermate WT  
204 and DTA<sup>het</sup> mice respectively) were compiled for clustering analysis, and there  
205 revealed 10 distinct populations visualized with uniform manifold approximation and  
206 projection (UMAP) embeddings (Figure 5A, B and C). These 10 distinct populations  
207 included B cell, hematopoietic stem cell and progenitor cell (HSPC), megakaryocyte,  
208 neutrophil, erythrocyte, monocyte, dendritic cell (DC), macrophage, T cell and  
209 mesenchymal stem cell (MSC) (Figure 5A and C). Proportion analysis revealed a  
210 significant expansion of neutrophils in DTA<sup>het</sup> mice (Figure 5D and E). Also, the  
211 number of B cells was significantly less in DTA<sup>het</sup> mice than that in WT mice (Figure  
212 5D and E), which implicated that osteocytes ablation induced lymphoid-myeloid  
213 malfunction in the bone marrow. To further dissect the differences in the bone marrow  
214 development between two groups, RNA velocity was performed. The result showed  
215 that DTA<sup>het</sup> mice have stronger directionality of velocity vectors from the HSPC  
216 population to the neutrophil population compared to WT mice (Figure 5F), implying  
217 that osteocytes deletion altered HSPC differentiation. Meanwhile, myeloid trajectory  
218 analysis revealed that there was a significantly higher pseudotime density distribution  
219 in G4 cell (a subcluster of neutrophil) in DTA<sup>het</sup> mice (Figure 5G). In contrast,  
220 lymphoid trajectory analysis demonstrated a relatively lower pseudotime density  
221 distribution in pre-B cell and immature B cell (subclusters of B cell) in DTA<sup>het</sup> mice  
222 (Figure 5H).



223

224 To corroborate the results observed from scRNA-seq, flow cytometry and further  
225 analysis were performed after removing adherent cells (Figure 5 - figure supplement  
226 1A and B). Although there was no significant change of hematopoietic stem cell  
227 (HSC) (Lin<sup>-</sup>c-Kit<sup>+</sup>Sca1<sup>+</sup>, LSK<sup>+</sup> cell) numbers between DTA<sup>het</sup> and WT mice (Figure 5  
228 - figure supplement 2A and B), DTA<sup>het</sup> mice demonstrated significantly increased  
229 number of short-term HSC (ST-HSC) with decreased number of long-term HSC (LT-  
230 HSC), indicating that HSC in DTA<sup>het</sup> mice bone marrow was mobilized (Figure 5 -  
231 figure supplement 2C and D). Further flow cytometry analysis revealed that the  
232 number of myeloid progenitors including common myeloid progenitors (CMP),  
233 granulocyte-monocyte progenitors (GMP) and common monocyte progenitors  
234 (cMoP) were substantially increased after osteocyte ablation (Figure 5I and J, Figure  
235 5 - figure supplement 2E and F), and megakaryocyte erythroid progenitors (MEP)  
236 numbers were decreased (Figure 5I and J). Meanwhile, total CD11b<sup>+</sup> myeloid cells  
237 were also increased (Figure 5K and L) in DTA<sup>het</sup> mice, in which both neutrophil and  
238 monocytes significantly expanded (Figure 5M and N, Figure 5 - figure supplement 2G  
239 and H). In addition, while the proportion of common lymphoid progenitors (CLP) was  
240 not altered in DTA<sup>het</sup> mice (Figure 5I and J), total B220<sup>+</sup> lymphoid cells reduced  
241 remarkably after osteocyte ablation (Figure 5O and P), in which DTA<sup>het</sup> mice showed  
242 a relatively lower proportion of early B cell (pro-B pre-B, immature B and transitional  
243 B cell) and a relatively higher proportion of late B cell (early mature B and late  
244 mature B) (Figure 5K and L), which suggested that B cell development was impaired  
245 along the immature B to mature B cell transition in DTA<sup>het</sup> mice. As scRNA-seq  
246 revealed that neutrophil underwent a significant change after osteocyte ablation,  
247 neutrophil population were further reclustered into four subclusters from G1 to G4  
248 (Figure 5 - figure supplement 3A and B) and G4 population was significantly  
249 increased in DTA<sup>het</sup> mice compared to WT mice (Figure 5 - figure supplement 3C and  
250 D), which implied that osteocyte ablation accelerated neutrophil maturation.  
251 Consistent with this observation, neutrophil functions including activation,  
252 chemotaxis were all upregulated in DTA<sup>het</sup> mice (Figure 5 - figure supplement 3E and  
253 F). Genes related to glycolysis and necroptosis were also upregulated (Figure 5 -  
254 figure supplement 3G and H), indicating that osteocyte ablation induced neutrophil  
255 functions. Together, these results demonstrated that osteocyte ablation altered  
256 hematopoietic lineage, characterized by the shift from lymphopoiesis to myelopoiesis.

257

### 258 **Organismal senescence of osteoprogenitors and myeloid lineage cells leads to the** 259 **skeletal premature aging**

260 Senescence occurred during development as a precise programmed cellular process,  
261 contributes to cell fate specification, tissue patterning and transient structure  
262 removal (Munoz-Espin and Serrano 2014; Rhinn, Ritschka, and Keyes 2019). Given  
263 that DTA<sup>het</sup> mice had a skeletal premature aging with increased myelopoiesis,  
264 osteoporosis and sarcopenia, we hypothesized that osteocyte ablation may induce  
265 organismal senescence of osteoprogenitors and myeloid lineage cells. ScRNA-seq  
266 revealed that total bone marrow had increased senescence with a higher senescence

267 associated secretory phenotype (SASP) score in DTA<sup>het</sup> mice compared to WT mice  
268 (Figure 6A). DTA<sup>het</sup> mice also had increased maturity in bone marrow reflected from  
269 RNA velocity (Figure 6B). Meanwhile, circulatory SASP including Tnf- $\alpha$ , Il1 $\beta$  and  
270 Il6 were also elevated in DTA<sup>het</sup> mice (Figure 6C). Further scRNA-seq analysis  
271 uncovered that mesenchymal stem cell (MSC), CMP, monocyte and its subcluster  
272 Ly6c2 monocyte, neutrophil and its subcluster G2, G3 and G4 had increased SASP  
273 scores (Figure 6D-G). RT-qPCR also verified the elevated senescence with increased  
274 gene expressions including p16 and p21 in DTA<sup>het</sup> mice (Figure 6 - figure supplement  
275 1A and B). Together, these results suggested that osteocyte reduction induced  
276 senescence in osteoprogenitors and myeloid lineage cells.

277

278 Owing to the fact that osteoblast derived from mesenchymal stem cell lineage, we  
279 next investigated whether accumulation of osteoprogenitor cell senescence impaired  
280 osteogenesis. GO analysis revealed that downregulated genes after osteocyte ablation  
281 were enriched in ossification and biomineral tissue development (Figure 6 - figure  
282 supplement 1C), which was consistent with the finding of impaired osteoblast  
283 differentiation (Figure 4H-J). Similarly, Kyoto Encyclopedia of Genes and Genomes  
284 (KEGG) analysis revealed that the subcluster 2 and 4 of Ly6c2<sup>+</sup> monocytes  
285 demonstrated the enrichment of osteoclast differentiation related genes after osteocyte  
286 ablation (Figure 6 - figure supplement 1D and E), which was corroborated in our  
287 enhanced in vitro osteoclast differentiation (Figure 4O-Q). Together, our data  
288 suggested that senescence in osteoprogenitors and myeloid lineage cells led to the  
289 impaired osteogenesis and increased osteoclastogenesis, respectively.

290

## 291 **Discussion**

292 In this study, we demonstrated an important role of osteocytes in regulating  
293 organismal senescence of bone and bone marrow. Partial ablation of osteocytes<sup>DMP-1</sup>  
294 caused severe sarcopenia, osteoporosis and degenerative kyphosis, which led to  
295 shorter lifespan. Acquisition of a senescence-associated secretory phenotype (SASP)  
296 in both osteoprogenic and myeloid lineage cells is underlying cause that led to the  
297 skeletal premature aging phenotype of impaired osteogenesis, increased  
298 osteoclastogenesis and myelopoiesis.

299

300 Sarcopenia usually occurs concurrently with osteoporosis during aging(Clynes et al.  
301 2021). Our study has showed for the first time that osteocyte ablation caused severe  
302 sarcopenia and muscle atrophy. In consistent with our observation, previous studies  
303 have reported that osteocyte-specific ablation of Cx43 impaired muscle  
304 formation(Shen et al. 2015). Osteocyte-derived factors has also been shown to  
305 stimulate myogenic differentiation in vitro(Huang et al. 2017). On the contrary,  
306 specific deletion of Mbtps1 in osteocyte promotes soleus muscle regeneration and  
307 increase its size with age(Gorski et al. 2016). Sclerostin, an osteocyte-derived  
308 circulating protein, is negatively correlated with skeletal muscle mass(Kim et al.  
309 2019). Previously there has been a study showing weak DMP-1 expression in skeletal  
310 muscle fibers(Lim et al. 2017). This has led us to suggest that sarcopenia may be



311 caused directly by the DMP-1 expression in muscle. However, our histology finding  
312 of no obvious changes in the total number of nuclei of muscle in partial ablation of  
313 DMP-1 positive osteocytes suggested that the sarcopenia and muscle atrophy  
314 phenotype is most likely caused by the disturbance of osteocyte-muscle crosstalk.  
315 Certainly, further studies based on a more specific osteocyte ablation model are  
316 needed to understand the link of osteocytes between osteoporosis and sarcopenia.  
317 Nevertheless, severe kyphosis observed in these osteocyte ablation mice, support our  
318 hypothesis of direct osteocyte-muscle crosstalk, as kyphosis is the direct result of the  
319 significant bone loss and sarcopenia(Wijshake et al. 2012; Woods et al. 2020).

320

321 Osteocytes regulate the process of bone resorption mediated by osteoclasts and  
322 coupled bone formation mediated by osteoblasts via secreting products like sclerostin  
323 and RANKL(Tresguerres, et al. 2020; van Bezooijen et al. 2005; Nakashima et al.  
324 2011). Theoretically, osteocyte ablation may lead to lower expression of sclerostin  
325 and RANKL with increased osteogenesis and impaired osteoclastogenesis. But our  
326 results demonstrated that osteocyte ablation impaired osteogenesis and induced  
327 osteoclastogenesis. Furthermore, the expression of sclerostin mRNA was reduced as  
328 expected, the serum RANKL was increased after osteocyte ablation. We speculated  
329 that induction of SASP in both osteoprogenitors and myeloid progenitors may be  
330 account for the underlying cause. Senescent osteoprogenitors have reduced self-  
331 renewal capacity and predominantly differentiate into adipocytes as opposed to  
332 osteoblasts(Chen, et al. 2016; Li et al. 2017; Rosen et al. 2009). Consistently, our  
333 model indicated an increased adipogenesis after osteocyte ablation. Also, fat-  
334 induction factors inhibit osteogenesis during adipogenesis(Chen, et al. 2016). Thus,  
335 osteocyte ablation induced senescence accumulation in osteoprogenitors leading to  
336 the cell commitment towards adipogenesis with impaired osteogenesis. As for  
337 enhanced osteoclastogenesis, besides the production of RANKL from osteogenic cell  
338 like osteocytes and osteoblasts(Nakashima, et al. 2011; Fumoto et al. 2014), other  
339 cells like adipocyte, T cell also secret RANKL to regulate bone metabolism(Yu et al.  
340 2021; Hu et al. 2021; Djaafar et al. 2010; Takayanagi et al. 2000). Also, B cell can  
341 produce OPG to regulate RANKL/OPG axis(Li et al. 2007). In our model, increased  
342 adipogenesis, T cell expansion (data not shown) and decreased B cell number may  
343 compensate for the altered RANKL/OPG axis.

344

345 Bone marrow, embedded in the skeletal system, has a close link with matrix-  
346 embedded osteocyte. Previous studies have reported that osteocyte regulates  
347 myelopoiesis via  $Gs\alpha$  -dependent and -independent signaling(Fulzele, et al. 2013;  
348 Azab, et al. 2020). Recent study also reported that osteocyte mTORC1 signaling  
349 regulates granulopoiesis via secreted IL-19(Xiao, et al. 2021). Meanwhile, sclerostin  
350 secreted by osteocyte adversely affects B cell survival(Horowitz and Fretz 2012). In  
351 our study, when osteocytes were partially depleted, myelopoiesis especially  
352 granulopoiesis was significantly induced, but B cell development was significantly  
353 impaired. Further studies demonstrated that HSC was mobilized and shifted to  
354 myelopoiesis with increased CMP, GMP, cMoP and  $CD11b^+$  myeloid cells, in which

355 monocytes and neutrophils were increased, and neutrophil function was also activated  
356 after osteocyte ablation. While B cell number was severely reduced with altered  
357 development pattern. Interestingly, previous study has shown that osteoblastic cell  
358 support megakaryopoiesis and platelet formation(Xiao et al. 2017). In our study, the  
359 number of MEP (erythrocyte and platelet precursors) was also reduced, and scRNA-  
360 seq analysis showed no significant change in erythrocyte population (data not shown),  
361 inferring that osteocyte may also participate in regulating platelet formation. Together,  
362 these results provided evidence that osteocyte play essential roles in maintaining the  
363 HSC niche homeostasis. In conclusion, we demonstrated a critical role of osteocytes  
364 in regulating organismal senescence of bone, and bone marrow (Figure 7). Ablation of  
365 osteocytes induced SASP accumulation in bone marrow osteoprogenitors and myeloid  
366 lineage cells, which altered MSC and HSC lineage commitments with impaired  
367 osteogenesis, promoted myelopoiesis and osteoclastogenesis, leading to the skeletal  
368 premature aging phenotype with severe sarcopenia, osteoporosis, degenerative  
369 kyphosis and bone marrow myelopoiesis, thus shortened lifespan of mice. Targeting  
370 osteocyte function and cell fate may shed light on the therapeutic regimens for aging  
371 associated bone diseases.

372

## 373 **Materials and methods**

### 374 **Mice**

375 All mouse lines were maintained on a C57BL/6J background. DMP-1<sup>cre</sup> mice were  
376 provided by J. Q. (Jerry) Feng from Texas A&M College of Dentistry, USA (Jackson  
377 Laboratory stock number, 023047). DTA<sup>fl/+</sup> mice were from GemPharmatech (strain  
378 ID, T009408). Osteocyte ablation mice model during development was established by  
379 crossing DMP-1<sup>cre</sup> mice with DTA<sup>fl/fl</sup> mice to obtain DMP-1<sup>cre</sup> DTA<sup>fl/+</sup> mice (DTA<sup>het</sup>).  
380 All mice experiments were approved by the Animal Care and Use Committee of  
381 Shanghai Jiao Tong University Affiliated Sixth People's Hospital.

382

### 383 **Bone histomorphometry analysis**

384 Mice femur was dissected and fixed in 4% paraformaldehyde (PFA) for two days and  
385 further decalcified with 10% EDTA (pH=7.2) in 4°C for about 2 weeks. Then  
386 specimens were embedded in paraffin and sectioned at 4 μm thickness. TRAP staining  
387 was performed for osteoclast analysis. H&E staining was performed for adipocyte and  
388 osteocyte analysis. For osteoblast analysis, undecalcified femur was embedded in  
389 plastic and sectioned at 5 μm thickness and Goldner trichrome staining was  
390 performed. For dynamic histomorphometry analysis, double calcein-labeling was  
391 used. Briefly, each mouse was given 30 μg/gram body weight Calcein (Sigma) on day  
392 1 and day 7 by intraperitoneal injection before sacrifice. Bones were then fixed,  
393 dehydrated, embedded in plastic and cut into 5μm slices and calculated using the  
394 software under fluorescence. Bioquant Osteo software (Bioquant) was used for  
395 histomorphometry analysis. Accepted nomenclature was used to report the  
396 results(Dempster et al. 2013). ImageJ was used to measure the number of osteocyte  
397 lacunae.

398

399 **Immunofluorescence staining**

400 Both ends of the mice tibias/femurs were removed. Then they were embedded in OCT  
401 for frozen sectioning and cut parallel to the long axis of the long bones. Stop cutting  
402 when the maximum cross section of the long bones was observed. The OCT around  
403 the rest of the bones were melted at room temperature. The bone samples remained  
404 were washed 3 times in PBS for 10 minutes and fixed in 4% paraformaldehyde (PFA)  
405 for 2 hours. Then, they were immersed in 0.1% Triton X-100 for 1 hour, blocked using  
406 3% BSA and stained using Alexa Fluor<sup>TM</sup> 568 Phalloidin (Invitrogen) for 48 hours at  
407 4°C in the dark with gentle shake. The samples were washed 3 times with PBS for 10  
408 minutes. The cross section of the sample was inverted in the confocal dish. Pictures  
409 were captured using confocal microscopy (Olympus) and ImageJ was used to measure  
410 the number dendrites per osteocyte.

411

412 **Bone density measurements**

413 Mice femurs and L3 lumbar were stripped of soft tissue and fixed in 4% PFA  
414 overnight at 4 °C, then stored in 70% ethanol until scanned using the  $\mu$ CT instrument  
415 (SkyScan 1176). Relevant structure parameters of the  $\mu$ CT instrument were as  
416 previous reported (Ding et al. 2022): scanning voxel size,  $9 \times 9 \times 9 \mu\text{m}^3$ ; X-ray tube  
417 potential, 50 kV and 450  $\mu\text{A}$ ; integration time, 520 ms; rotation Step,  $0.4^\circ$  for  $180^\circ$   
418 scanning. CTAn micro-CT software version 1.13 (Bruker) was used to analyze the  
419 images. The threshold value (grayscale index) for all trabecular bone was 75. For all  
420 cortical bone the threshold value (grayscale index) was 110. The femurs were  
421 analyzed at a resolution of 9  $\mu\text{m}$ . The volumetric regions for trabecular analyses  
422 include the secondary spongiosa located 1 mm from the growth plate and extending  
423 1.8 mm (200 sections) proximally. For cortical bone analysis, the volumetric regions  
424 include 600  $\mu\text{m}$  long at mid-diaphysis of the femur (300  $\mu\text{m}$  extending proximally and  
425 distally from the diaphyseal midpoint between the proximal and distal growth plates).  
426 For vertebrae, the volumetric regions include the entire trabecular region without the  
427 primary spongiosa (300  $\mu\text{m}$  below the cranial and above the caudal growth plate).  
428 Morphometric parameters including bone mineral density (BMD), bone volume/total  
429 volume fraction (BV/TV), trabecular number (Tb.N), trabecular thickness (Tb.Th),  
430 trabecular separation (Tb.Sp), cortical thickness (Ct.Th) and cortical porosity (Ct.Po)  
431 were calculated.

432

433 **Gait analysis**

434 CatWalk automated gait analysis system (Noldus Information Technology) was used  
435 to analysis gait. Mice were expected to run along a special glass plate with a green  
436 LED lit and a high-speed video camera under it. Their paws were captured by the  
437 camera. Before the formal experiments, the mice were habituated in the plate to  
438 achieve an unforced locomotion. Three compliant runs without stopping, changing  
439 direction and turning around were analyzed with Catwalk Software. Relevant data  
440 were generated by Catwalk Software after each footprint was checked manually. Data  
441 including stride length, swing speed and normal step sequence ratio were analyzed.

442

443 **Whole mount alcian blue/alizarin red staining**

444 The skin and viscera of the intact fetal mice (E19.0) were removed. The embryos  
445 were fixed in 95% ethanol overnight and then degreased in absolute acetone overnight  
446 with gentle agitation. The embryos were stained overnight in 0.015% alcian blue  
447 (Sigma) /0.005% alizarin red (Sigma) in 70% ethanol with gentle agitation. They were  
448 washed in 70% ethanol for 30 min three times and digested using 1% KOH solution.  
449 When most of the soft tissue was digested, the embryos were immersed in 75%  
450 (vol/vol)1% KOH/glycerol solution for further clearing. Graded glycerol was changed  
451 according to the degree of embryos digestion and relevant pictures were obtained  
452 under the microscope (Leica).

453

454 **Whole-body  $\mu$ CT scan**

455 13- and 37-week-old DTA<sup>het</sup> and wild-type mice were deeply anesthetized and  
456 carefully positioned with a dedicated cradle and holder to capture the whole-body  
457 (excluding the tail) radiographs at a resolution of 35  $\mu$ m using the  $\mu$ CT instrument  
458 (SkyScan 1176). Scanning details were listed as following: X-ray tube potential, 65  
459 kV and 375  $\mu$ A; exposure time, 150 ms; rotation step, 0.5° for 180° scanning. CTAn  
460 micro-CT software version 1.13 (Bruker) was used to reconstruct pictures.

461

462 **RNA-seq**

463 Total RNA of whole bone with bone marrow flushed out from 4 weeks WT and  
464 DTA<sup>het</sup> mice was extracted using Trizol reagent (ThermoFisher), quantified and  
465 purified using Bioanalyzer 2100 and RNA 6000 Nano LabChip Kit (Agilent).  
466 Following purification, mRNA library was constructed, fragmented, amplified and  
467 loaded into the nanoarray and sequencing was performed on Illumina Novaseq<sup>TM</sup>  
468 6000 platform following the vendor's recommender protocol. After sequencing,  
469 generated reads were filtered and mapped to the reference genome using HISAT2  
470 (v2.0.4) and assembled using StringTie (v1.3.4d) with default parameters. Then, all  
471 transcriptomes from all samples were merged to reconstruct a comprehensive  
472 transcriptome using gffcompare software (v0.9.8) and the expression levels of all  
473 transcripts were calculated by Stringtie and ballgown. Differential gene analysis was  
474 performed by DESeq2 software and then subjected to enrichment analysis of GO  
475 functions. The data were deposited into the GEO repository (GSE202356, secure  
476 token for reviewer: ipqryuycnloznsz)

477

478 **Cell culture**

479 *In vitro osteoclastogenesis assay*

480 The bone marrow of mice femurs and tibias were flushed to get bone marrow cells.  
481 Cells were cultured overnight by using  $\alpha$ -MEM (Hyclone) which contains 10% FBS  
482 (Gibco), 100  $\mu$ g/ml streptomycin (Gibco) and 100 U/ml penicillin (Gibco). The non-  
483 adherent cells were collected, layered on Ficoll-Paque (GE Healthcare) and separated  
484 through density gradient centrifugation at 4 °C and 2000 rpm for 20 min. The bmms  
485 were in the middle layer of the separation. Bmms were collected and washed twice  
486 with ice-cold PBS. To induce osteoclast differentiation, bmms ( $2.5 \times 10^4$  cells per well

487 for 96-well plates and  $8 \times 10^5$  per well for 6-well plates) were cultured by using  $\alpha$ -  
488 MEM which contains 10% FBS, 100  $\mu\text{g/ml}$  streptomycin, 100 U/ml penicillin, 100  
489 ng/ml M-CSF (Peprotech) and 100 ng/ml RANKL (Peprotech) for 5 days before  
490 TRAP staining. Cells were cultured at  $37^\circ\text{C}$  in a humidified incubator at 5%  $\text{CO}_2$ . The  
491 medium was changed every 2 days. At the end of assay (the fifth day), the cells were  
492 fixed and stained with Tartrate-resistant acid phosphatase (TRAP) kit according to the  
493 manufacturer's instructions (Sigma) to quantify osteoclast numbers, or RNA was  
494 extracted as recommended protocol. TRAP-positive cells which contains more than  
495 three nuclei were counted as mature osteoclast-like cells (OCLs). The assay was  
496 repeated three times and number of OCLs per well were recorded for each biological  
497 replicate.

498

#### 499 *Harvest of calvarial osteoblasts and osteogenic differentiation*

500 Neonatal DTA<sup>het</sup> and WT pubs (P0) was euthanized and decapitated using scissors.  
501 The calvaria were separated and any loose connective tissue from the calvaria were  
502 removed. Then, the calvaria were digested five times using  $\alpha$ -MEM which contains  
503 0.1% collagenase (Roche) and 0.2% dispase (Roche) in a  $37^\circ\text{C}$  constant temperature  
504 shaking table set at 250 rpm for 10 min. The last four times' digestive production  
505 which contains calvarial osteoblasts were collected and cultured in  $\alpha$ -MEM  
506 containing 10% FBS, 100 U/ml penicillin, 100  $\mu\text{g/ml}$  streptomycin. After culturing  
507 the cells to 70–80 % confluence prior, they were re-plated at a density of 5000 cells  
508 per well for 96-well plates or  $2 \times 10^5$  cells per well for 6-well plates. When the cells  
509 were cultured to 70-80 % confluence prior, the medium was replaced with osteogenic  
510 differentiation medium (Cyagen) and changed every 2 days. After a week of  
511 differentiation, the cells were either fixed and ALP staining was performed, or RNA  
512 extraction was performed. After three weeks of differentiation, alizarin red staining  
513 was performed.

514

#### 515 **RT-qPCR**

516 Total RNA was isolated using RNeasy<sup>®</sup> Mini Kit (Qiagen). 500 ng of total RNA was  
517 reverse transcribed into cDNA using PrimeScript<sup>™</sup> RT Master Mix (Takara,  
518 RR036A). qPCR analyses were performed using SYBR Premix Ex Taq<sup>™</sup> II (Takara,  
519 RR820L) and samples were run on the ABI HT7900 platform (Applied Biosystems).  
520 SYBR Green PCR conditions were 1 cycle of  $95^\circ\text{C}$  for 30 seconds, and 40 cycles of  
521  $95^\circ\text{C}$  for 5 seconds and  $34^\circ\text{C}$  for 60 seconds. Melting curve stage was added to check  
522 primers specificity. Relative gene expression levels were calculated using the  
523 threshold cycle ( $2^{-\Delta\Delta\text{CT}}$ ) method. Relevant primers were listed as below: Gapdh: 5'-  
524 ACC CAG AAG ACT GTG GAT GG-3' and 5'-CAC ATT GGG GGT AGG AAC AC-  
525 3'; p21: 5'-GTC AGG CTG GTC TGC CTC CG-3' and 5'-CGG TCC CGT GGA CAG  
526 TGA GCA G-3'; p16: 5'-GTC AGG CTG GTC TGC CTC CG-3' and 5'-CGG TCC  
527 CGT GGA CAG TGA GCA G-3'; Il6: 5'-CTG GGA AAT CGT GGA AT-3' and 5'-  
528 CCA GTT TGG TAG CAT CCA TC-3'; Mep1: 5'-GCA TCC ACG TGT TGG CTC A-  
529 3' and 5'-CTC CAG CCT ACT CAT TGG GAT CA-3'; Tnf: 5'-ATG AGA AGT TCC  
530 CAA ATG GC-3' and 5'-CTC CAC TTG GTG GTT TGC TA-3'; Il1b: 5'-GCC CAT



531 CCT CTG TGA CTC AT-3' and 5'-AGG CCA CAG GTA TTT TGT CG-3'; Alp: 5'-  
532 TCA GGG CAA TGA GGT CAC AT-3' and 5'-CCT CTG GTG GCA TCT CGT TA-  
533 3'; Ocn: 5'-CCC TGA GTC TGA CAA AGC CT-3' and 5'-GCG GTC TTC AAG CCA  
534 TAC TG-3'; Col1a1: 5'-ATA AGT CCC TTC CTG CCC AC-3' and 5'-TGG GAC ATT  
535 TCA GCA TTG CC-3'; Opn: 5'-ATG CCA CAG ATG AGG ACC TC-3' and 5'-CCT  
536 GGC TCT CTT TGG AAT GC-3'; Osx: 5'-TCG GGG AAG AAG AAG CCA AT-3'  
537 and 5'-CAA TAG GAG AGA GCG AGG GG-3'; Runx2: 5'-GCC CAG GCG TAT  
538 TTC AGA TG-3' and 5'-GGT AAA GGT GGC TGG GTA GT-3'; Dmp1: 5'-CAG  
539 TGA GGA TGA GGC AGA CA-3' and 5'-CGA TCG CTC CTG GTA CTC TC-3';  
540 Sost: 5'-GCC GGA CCT ATA CAG GAC AA-3' and 5'-CAC GTA GCC CAA CAT  
541 CAC AC-3'; Trap: 5'-TGG ACA TGA CCA CAA CCT GCA GTA-3' and 5'-TCG CAC  
542 AGA GGG ATC CAT GAA GTT-3'; Calcr: 5'-AGC CAC AGC CTA TCA GCA CT-  
543 3' and 5'-GAC CCA CAA GAG CCA GGT AA-3' ; OC-Stamp: 5'-TGG GCC TCC  
544 ATA TGA CCT CGA GTA G-3' and 5'-TCA AAG GCT TGT AAA TTG GAG GAG  
545 T-3'; ATP6v0d2: 5'-ACA TGT CCA CTG GAA GCC CAG TAA-3' and 5'-ATG AAC  
546 GTA TGA GGC CAG TGA GCA-3'; Dap12: 5'-CTG GTG TAC TGG CTG GGA TT-  
547 3' and 5'-CTG GTC TCT GAC CCT GAA GC-3'. All these primers were synthesized  
548 by Sangon Biotech company (Shanghai).

549

#### 550 **Flow cytometry**

551 Bone marrow cells were isolated by flushing the bone marrow of mice femurs and  
552 tibias with PBS and were dissociated into a single cell suspension by gently filtering  
553 them through 70 µm nylon mesh. After red blood cells lysis, the isolated cells were  
554 blocked by anti-mouse CD16/32 antibody (Biolegend, 101302) for 15 min and stained  
555 with fluorescence-conjugated antibodies for 30 min at 4°C in the dark. Relevant  
556 antibodies were listed as below and their catalog numbers were provided in the  
557 brackets: anti-Ly-6C-Pacific Blue™ (128013), anti-Ly-6C-PE (128007), anti-Ly-6G-  
558 Pacific Blue™ (127611), anti-Ly-6G-PE/Cy7 (127617), anti-CD16/32-FITC  
559 (101305), anti-CD115-PE (135505), anti-CD117-PE (105808), anti-CD117-APC/Cy7  
560 (105825), anti-CD45R-PE/Cy5 (103209), anti-CD45R-APC (103212), anti-Ly-6A/E-  
561 APC (108111), anti-Ly-6A/E-Alexa Fluor®700(108142), anti-CD34-  
562 PerCP/Cyannine5.5 (128607), anti-CD135-APC (135309), anti-lineage cocktail-  
563 Pacific Blue™ (133305), anti-CD127-PE (121111), anti-CD127-APC(135011), anti-  
564 CD11b-FITC (101205) and anti-CD24-Pacific Blue™ (101819). All these antibodies  
565 were purchased from Biolegend. Samples were analyzed using cytometer CytoFlex  
566 (Beckman Coulter) and FlowJo software version 10.4. 50000 events were collected  
567 for each sample.

568

#### 569 **Preparation of mice serum**

570 For serum collection, mice were anesthetized with isoflurane and blood samples were  
571 collected from the ophthalmic vein. Samples were then centrifuged at 5000 rpm for 5  
572 min. Supernatants were transferred to a new tube and centrifuged at 5000 rpm for 5  
573 min again. Supernatants were collected to a new tube and treated with liquid nitrogen  
574 fast and then stored at -80 °C.



575

576 **Enzyme-linked immunosorbent assay (ELISA)**

577 Elisa was performed as kit instructions (Jianglai). Briefly, working standards and  
578 diluted samples were prepared and added to each well. Plates were sealed and  
579 incubated for 1 hour at 37 °C. After washing three times, 100 µl enzyme-labeled  
580 reagents were added and plates were incubated for 1 hour at 37 °C. Finally, TMB  
581 substrates were added and incubated for 15-30 minutes at 37 °C followed by Stop  
582 solution addition. Then plates were read at 450 nm within 5 minutes.

583

584 **Single cell collection, library construction and sequencing**

585 Bone marrow cells from WT and DTA<sup>het</sup> mice were flushed and sieved through a 70  
586 µm cell strainer. After red blood cell analysis, dissociated single cells were stained  
587 with AO/PI for viability assessment. Single-cell RNA sequencing (scRNA-seq) was  
588 performed using 10× Genomics Chromium platform. Related operations including  
589 Generation of gel beads in emulsion (GEMs), barcoding, GEM-RT cleanup,  
590 complementary DNA amplification and library construction were all carried out  
591 following the manufacturer's protocol. By using 150-base-pair paired-end reads, the  
592 final libraries were sequenced on the Illumina NovaSeq 6000 platform. The scRNA-  
593 seq data could be accessed from GEO database (GSE202516, secure token for  
594 reviewer: ihudckqqxvopruz)

595

596 **Data processing, dimension reduction, unsupervised clustering and annotation**

597 ScRNA-seq data analysis was performed by NovelBio Co.,Ltd with NovelBrain  
598 Cloud Analysis Platform ([www.novelbrain.com](http://www.novelbrain.com)). Fastp was applied with default  
599 parameters filtering the adaptor sequence and the low-quality reads were removed to  
600 achieve the clean data. Then the feature-barcode matrices were obtained by aligning  
601 reads to the mouse genome (mm10 Ensemble: version 92) using CellRanger v3.1.0.  
602 Down sample analysis among samples sequenced was applied according to the  
603 mapped barcoded reads per cell of each sample and finally achieved the aggregated  
604 matrix. Cells contained over 200 expressed genes and mitochondria UMI rate below  
605 20% passed the cell quality filtering and mitochondria genes were removed in the  
606 expression table.

607

608 Seurat package (version: 3.1.4, <https://satijalab.org/seurat/>) was used for cell  
609 normalization and regression based on the expression table according to the UMI  
610 counts of each sample and percent of mitochondria rate to obtain the scaled data. PCA  
611 was constructed based on the scaled data with top 2000 high variable genes and top  
612 10 principals were used for tSNE construction and UMAP construction. Utilizing  
613 graph-based cluster method, the unsupervised cell cluster results based the PCA top  
614 10 principal were acquired, and the marker genes by FindAllMarkers function with  
615 wilcox rank sum test algorithm was calculated under following criteria: lnFC > 0.25,  
616 p value < 0.05 and min.pct > 0.1. To identify the cell type detailed, the clusters of  
617 same cell type were selected for re-tSNE analysis, graph-based clustering and marker  
618 analysis.

619

### 620 **Identification of differential gene expression and gene enrichment analysis**

621 To identify differentially expressed genes among samples, the function FindMarkers  
622 with wilcox rank sum test algorithm was used under following criteria:  $\ln FC > 0.25$ ,  $p$   
623 value  $< 0.05$  and  $\min.pct > 0.1$ . Gene ontology (GO) analysis was performed to  
624 facilitate elucidating the biological implications of marker genes and differentially  
625 expressed genes. The GO annotations from NCBI (<http://www.ncbi.nlm.nih.gov/>),  
626 UniProt (<http://www.uniprot.org/>) and the Gene Ontology  
627 (<http://www.geneontology.org/>) were downloaded. Fisher's exact test was applied to  
628 identify the significant GO categories and FDR was used to correct the  $p$ -values.  
629 Pathway analysis was used to find out the significant pathway of the marker genes  
630 and differentially expressed genes according to KEGG database. Fisher's exact test  
631 was applied to select the significant pathway, and the threshold of significance was  
632 defined by  $P$ -value and FDR. To characterize the relative activation of a given gene  
633 set such as pathway activation, QuSAGE (2.16.1) analysis was performed, and related  
634 gene set involving neutrophil function and SASP were from ref. (Xie et al. 2020;  
635 Zhang et al. 2021) and listed in supplement file table 2.

636

### 637 **Developmental trajectory inference and RNA velocity analysis**

638 The Single-Cell Trajectories analysis was applied utilizing Monocle2 ([http://cole-](http://cole-trapnell-lab.github.io/monocle-release)  
639 [trapnell-lab.github.io/monocle-release](http://cole-trapnell-lab.github.io/monocle-release)) using DDR-Tree and default parameter.  
640 Before Monocle analysis, marker genes of the Seurat clustering result and raw  
641 expression counts of the cell passed filtering were selected. Based on the pseudo-time  
642 analysis, branch expression analysis modeling (BEAM Analysis) was applied for  
643 branch fate determined gene analysis. To estimate the cell dynamics, RNA Velocity  
644 analysis was performed through scVelo package (Version0.2.3) based on ScanPy  
645 package (Versionv1.5.0) with default parameters.

646

### 647 **Statistical analysis**

648 All data were analyzed using GraphPad Prism (v8.2.1) software for statistical  
649 significance.  $P$  value was determined by the student's  $t$  test for two-group or one-way  
650 ANOVA test for multiple group comparisons. Gehan-Breslow-Wilcoxon test was used  
651 for analyzing Kaplan-Meier curve of WT and DTA<sup>het</sup> mice.

652

### 653 **Author contributions**

654 J.J.G., C.Q.Z. and M.H.Z. conceived, designed, and supervised the study. P. D.,  
655 C.A.G., Y.S.G. performed the experiment and analyzed the data. D.L.L., H.L., J.X.,  
656 X.Y.C., Y.G.H provided suggestions. P. D., C.A.G. wrote the manuscript.

657

### 658 **Acknowledgements**

659 This work was supported by National Natural Science Foundation of China  
660 (82002339 to J.J.G, 81820108020 to C.Q.Z.) and Shanghai Frontiers Science Center  
661 of Degeneration and Regeneration in Skeletal System (BJ1-9000-22-4002).

662

663 **Data and materials availability**

664 ScRNA-Seq and RNA-seq data have been deposited into GEO repository with  
665 accession codes GSE202516 and GSE202356 respectively. Additional data that  
666 support the findings of this study are available from the corresponding author on  
667 request. Source data are provided with this paper.

668

669 **Conflict of Interest**

670 The authors declare no conflict of interest.

671

672 **Reference**

673 Asada, N., Y. Katayama, M. Sato, K. Minagawa, K. Wakahashi, H. Kawano, Y.  
674 Kawano, A. Sada, K. Ikeda, T. Matsui, and M. Tanimoto. 2013. Matrix-  
675 Embedded Osteocytes Regulate Mobilization of Hematopoietic  
676 Stem/Progenitor Cells. *Cell Stem Cell* 12: 737-47.  
677 <https://dx.doi.org/10.1016/j.stem.2013.05.001>, PMID: 23746979.

678 Azab, E., K. B. Chandler, Y. Uda, N. Sun, A. Hussein, R. Shuwaikan, V. Lu, C. E.  
679 Costello, M. E. McComb, and P. Divieti Pajevic. 2020. Osteocytes Control  
680 Myeloid Cell Proliferation and Differentiation through Gsalpha-Dependent  
681 and -Independent Mechanisms. *FASEB J* 34: 10191-10211.  
682 <https://dx.doi.org/10.1096/fj.202000366R>, PMID: 32557809.

683 Breitman, M. L., H. Rombola, I. H. Maxwell, G. K. Klintworth, and A. Bernstein.  
684 1990. Genetic Ablation in Transgenic Mice with an Attenuated Diphtheria  
685 Toxin a Gene. *Mol Cell Biol* 10: 474-9.  
686 <https://dx.doi.org/10.1128/mcb.10.2.474-479.1990>, PMID: 2300048.

687 Cain, C. J., R. Rueda, B. McLelland, N. M. Collette, G. G. Loots, and J. O. Manilay.  
688 2012. Absence of Sclerostin Adversely Affects B-Cell Survival. *J Bone Miner  
689 Res* 27: 1451-61. <https://dx.doi.org/10.1002/jbmr.1608>, PMID: 22434688.

690 Chen, Q., P. Shou, C. Zheng, M. Jiang, G. Cao, Q. Yang, J. Cao, N. Xie, T. Velletri, X.  
691 Zhang, C. Xu, L. Zhang, H. Yang, J. Hou, Y. Wang, and Y. Shi. 2016. Fate  
692 Decision of Mesenchymal Stem Cells: Adipocytes or Osteoblasts? *Cell Death  
693 Differ* 23: 1128-39. <https://dx.doi.org/10.1038/cdd.2015.168>, PMID:  
694 26868907.

695 Clynes, M. A., C. L. Gregson, O. Bruyere, C. Cooper, and E. M. Dennison. 2021.  
696 Osteosarcopenia: Where Osteoporosis and Sarcopenia Collide. *Rheumatology  
697 (Oxford)* 60: 529-537. <https://dx.doi.org/10.1093/rheumatology/keaa755>,  
698 PMID: 33276373.

699 Dempster, D. W., J. E. Compston, M. K. Drezner, F. H. Glorieux, J. A. Kanis, H.  
700 Malluche, P. J. Meunier, S. M. Ott, R. R. Recker, and A. M. Parfitt. 2013.  
701 Standardized Nomenclature, Symbols, and Units for Bone Histomorphometry:  
702 A 2012 Update of the Report of the Asbmr Histomorphometry Nomenclature  
703 Committee. *J Bone Miner Res* 28: 2-17. <https://dx.doi.org/10.1002/jbmr.1805>,  
704 PMID: 23197339.

705 Ding, P., Q. Tan, Z. Wei, Q. Chen, C. Wang, L. Qi, L. Wen, C. Zhang, and C. Yao.  
706 2022. Toll-Like Receptor 9 Deficiency Induces Osteoclastic Bone Loss Via

- 707 Gut Microbiota-Associated Systemic Chronic Inflammation. *Bone Res* 10: 42.  
708 <https://dx.doi.org/10.1038/s41413-022-00210-3>, PMID: 35624094.
- 709 Divieti Pajevic, P., and D. S. Krause. 2019. Osteocyte Regulation of Bone and Blood.  
710 *Bone* 119: 13-18. <https://dx.doi.org/10.1016/j.bone.2018.02.012>, PMID:  
711 29458123.
- 712 Djaafar, S., D. D. Pierroz, R. Chicheportiche, X. X. Zheng, S. L. Ferrari, and S.  
713 Ferrari-Lacraz. 2010. Inhibition of T Cell-Dependent and Rankl-Dependent  
714 Osteoclastogenic Processes Associated with High Levels of Bone Mass in  
715 Interleukin-15 Receptor-Deficient Mice. *Arthritis Rheum* 62: 3300-10.  
716 <https://dx.doi.org/10.1002/art.27645>, PMID: 20617528.
- 717 Feng, J. Q., H. Huang, Y. Lu, L. Ye, Y. Xie, T. W. Tsutsui, T. Kunieda, T. Castranio, G.  
718 Scott, L. B. Bonewald, and Y. Mishina. 2003. The Dentin Matrix Protein 1  
719 (Dmp1) Is Specifically Expressed in Mineralized, but Not Soft, Tissues  
720 During Development. *J Dent Res* 82: 776-80.  
721 <https://dx.doi.org/10.1177/154405910308201003>, PMID: 14514755.
- 722 Fulzele, K., D. S. Krause, C. Panaroni, V. Saini, K. J. Barry, X. Liu, S. Lotinun, R.  
723 Baron, L. Bonewald, J. Q. Feng, M. Chen, L. S. Weinstein, J. Y. Wu, H. M.  
724 Kronenberg, D. T. Scadden, and P. Divieti Pajevic. 2013. Myelopoiesis Is  
725 Regulated by Osteocytes through Gsalpha-Dependent Signaling. *Blood* 121:  
726 930-9. <https://dx.doi.org/10.1182/blood-2012-06-437160>, PMID: 23160461.
- 727 Fulzele, K., F. Lai, C. Dedic, V. Saini, Y. Uda, C. Shi, P. Tuck, J. L. Aronson, X. Liu,  
728 J. M. Spatz, M. N. Wein, and P. Divieti Pajevic. 2017. Osteocyte-Secreted Wnt  
729 Signaling Inhibitor Sclerostin Contributes to Beige Adipogenesis in Peripheral  
730 Fat Depots. *J Bone Miner Res* 32: 373-384.  
731 <https://dx.doi.org/10.1002/jbmr.3001>, PMID: 27653320.
- 732 Fumoto, T., S. Takeshita, M. Ito, and K. Ikeda. 2014. Physiological Functions of  
733 Osteoblast Lineage and T Cell-Derived Rankl in Bone Homeostasis. *J Bone  
734 Miner Res* 29: 830-42. <https://dx.doi.org/10.1002/jbmr.2096>, PMID:  
735 24014480.
- 736 Gorgoulis, V., P. D. Adams, A. Alimonti, D. C. Bennett, O. Bischof, C. Bishop, J.  
737 Campisi, M. Collado, K. Evangelou, G. Ferbeyre, J. Gil, E. Hara, V.  
738 Krizhanovskiy, D. Jurk, A. B. Maier, M. Narita, L. Niedernhofer, J. F. Passos,  
739 P. D. Robbins, C. A. Schmitt, J. Sedivy, K. Vougas, T. von Zglinicki, D. Zhou,  
740 M. Serrano, and M. Demaria. 2019. Cellular Senescence: Defining a Path  
741 Forward. *Cell* 179: 813-827. <https://dx.doi.org/10.1016/j.cell.2019.10.005>,  
742 PMID: 31675495.
- 743 Gorski, J. P., N. T. Huffman, J. Vallejo, L. Brotto, S. V. Chittur, A. Breggia, A. Stern,  
744 J. Huang, C. Mo, N. G. Seidah, L. Bonewald, and M. Brotto. 2016. Deletion  
745 of Mbtps1 (Pcsk8, S1p, Ski-1) Gene in Osteocytes Stimulates Soleus Muscle  
746 Regeneration and Increased Size and Contractile Force with Age. *J Biol Chem*  
747 291: 4308-22. <https://dx.doi.org/10.1074/jbc.M115.686626>, PMID: 26719336.
- 748 Horowitz, M. C., and J. A. Fretz. 2012. Sclerostin: A New Mediator of Crosstalk  
749 between the Skeletal and Immune Systems. *J Bone Miner Res* 27: 1448-50.  
750 <https://dx.doi.org/10.1002/jbmr.1672>, PMID: 22706900.

- 751 Hu, Y., X. Li, X. Zhi, W. Cong, B. Huang, H. Chen, Y. Wang, Y. Li, L. Wang, C. Fang,  
752 J. Guo, Y. Liu, J. Cui, L. Cao, W. Weng, Q. Zhou, S. Wang, X. Chen, and J.  
753 Su. 2021. Rankl from Bone Marrow Adipose Lineage Cells Promotes  
754 Osteoclast Formation and Bone Loss. *EMBO Rep* 22: e52481.  
755 <https://dx.doi.org/10.15252/embr.202152481>, PMID: 34121311.
- 756 Huang, J., S. Romero-Suarez, N. Lara, C. Mo, S. Kaja, L. Brotto, S. L. Dallas, M. L.  
757 Johnson, K. Jahn, L. F. Bonewald, and M. Brotto. 2017. Crosstalk between  
758 Mlo-Y4 Osteocytes and C2c12 Muscle Cells Is Mediated by the Wnt/Beta-  
759 Catenin Pathway. *JBMR Plus* 1: 86-100.  
760 <https://dx.doi.org/10.1002/jbm4.10015>, PMID: 29104955.
- 761 Karsenty, G., and M. Ferron. 2012. The Contribution of Bone to Whole-Organism  
762 Physiology. *Nature* 481: 314-20. <https://dx.doi.org/10.1038/nature10763>,  
763 PMID: 22258610.
- 764 Katsnelson, A. 2010. Physiology: The Bones of Contention. *Nature* 466: 914-5.  
765 <https://dx.doi.org/10.1038/466914a>, PMID: 20725014.
- 766 Kim, J. A., E. Roh, S. H. Hong, Y. B. Lee, N. H. Kim, H. J. Yoo, J. A. Seo, N. H. Kim,  
767 S. G. Kim, S. H. Baik, and K. M. Choi. 2019. Association of Serum Sclerostin  
768 Levels with Low Skeletal Muscle Mass: The Korean Sarcopenic Obesity  
769 Study (Ksos). *Bone* 128: 115053.  
770 <https://dx.doi.org/10.1016/j.bone.2019.115053>, PMID: 31473261.
- 771 Le, P. M., M. Andreeff, and V. L. Battula. 2018. Osteogenic Niche in the Regulation  
772 of Normal Hematopoiesis and Leukemogenesis. *Haematologica* 103: 1945-  
773 1955. <https://dx.doi.org/10.3324/haematol.2018.197004>, PMID: 30337364.
- 774 Li, H., P. Liu, S. Xu, Y. Li, J. D. Dekker, B. Li, Y. Fan, Z. Zhang, Y. Hong, G. Yang, T.  
775 Tang, Y. Ren, H. O. Tucker, Z. Yao, and X. Guo. 2017. Foxp1 Controls  
776 Mesenchymal Stem Cell Commitment and Senescence During Skeletal Aging.  
777 *J Clin Invest* 127: 1241-1253. <https://dx.doi.org/10.1172/JCI89511>, PMID:  
778 28240601.
- 779 Li, Y., G. Toraldo, A. Li, X. Yang, H. Zhang, W. P. Qian, and M. N. Weitzmann. 2007.  
780 B Cells and T Cells Are Critical for the Preservation of Bone Homeostasis and  
781 Attainment of Peak Bone Mass in Vivo. *Blood* 109: 3839-48.  
782 <https://dx.doi.org/10.1182/blood-2006-07-037994>, PMID: 17202317.
- 783 Lim, J., J. Burclaff, G. He, J. C. Mills, and F. Long. 2017. Unintended Targeting of  
784 Dmp1-Cre Reveals a Critical Role for Bmpr1a Signaling in the  
785 Gastrointestinal Mesenchyme of Adult Mice. *Bone Res* 5: 16049.  
786 <https://dx.doi.org/10.1038/boneres.2016.49>, PMID: 28163952.
- 787 Long, F. 2011. Building Strong Bones: Molecular Regulation of the Osteoblast  
788 Lineage. *Nat Rev Mol Cell Biol* 13: 27-38.  
789 <https://dx.doi.org/10.1038/nrm3254>, PMID: 22189423.
- 790 Mendez-Ferrer, S., T. V. Michurina, F. Ferraro, A. R. Mazloom, B. D. Macarthur, S.  
791 A. Lira, D. T. Scadden, A. Ma'ayan, G. N. Enikolopov, and P. S. Frenette.  
792 2010. Mesenchymal and Haematopoietic Stem Cells Form a Unique Bone  
793 Marrow Niche. *Nature* 466: 829-34. <https://dx.doi.org/10.1038/nature09262>,  
794 PMID: 20703299.



- 795 Munoz-Espin, D., and M. Serrano. 2014. Cellular Senescence: From Physiology to  
796 Pathology. *Nat Rev Mol Cell Biol* 15: 482-96.  
797 <https://dx.doi.org/10.1038/nrm3823>, PMID: 24954210.
- 798 Nakashima, T., M. Hayashi, T. Fukunaga, K. Kurata, M. Oh-Hora, J. Q. Feng, L. F.  
799 Bonewald, T. Kodama, A. Wutz, E. F. Wagner, J. M. Penninger, and H.  
800 Takayanagi. 2011. Evidence for Osteocyte Regulation of Bone Homeostasis  
801 through Rankl Expression. *Nat Med* 17: 1231-4.  
802 <https://dx.doi.org/10.1038/nm.2452>, PMID: 21909105.
- 803 Quarles, L. Darryl. 2011. 'Dem Bones' Are Made for More Than Walking. *Nature*  
804 *Medicine* 17: 428-430. <https://dx.doi.org/10.1038/nm0411-428>, PMID:  
805 Razaque, M. S. 2009. The Fgf23-Klotho Axis: Endocrine Regulation of Phosphate  
806 Homeostasis. *Nat Rev Endocrinol* 5: 611-9.  
807 <https://dx.doi.org/10.1038/nrendo.2009.196>, PMID: 19844248.
- 808 Rhinn, M., B. Ritschka, and W. M. Keyes. 2019. Cellular Senescence in  
809 Development, Regeneration and Disease. *Development* 146.  
810 <https://dx.doi.org/10.1242/dev.151837>, PMID: 31575608.
- 811 Rosen, C. J., C. Ackert-Bicknell, J. P. Rodriguez, and A. M. Pino. 2009. Marrow Fat  
812 and the Bone Microenvironment: Developmental, Functional, and  
813 Pathological Implications. *Crit Rev Eukaryot Gene Expr* 19: 109-24.  
814 <https://dx.doi.org/10.1615/critreveukargeneexpr.v19.i2.20>, PMID: 19392647.
- 815 Sato, T., S. Verma, C. D. C. Andrade, M. Omeara, N. Campbell, J. S. Wang, M.  
816 Cetinbas, A. Lang, B. J. Ausk, D. J. Brooks, R. I. Sadreyev, H. M.  
817 Kronenberg, D. Lagares, Y. Uda, P. D. Pajevic, M. L. Bouxsein, T. S. Gross,  
818 and M. N. Wein. 2020. A Fak/Hdac5 Signaling Axis Controls Osteocyte  
819 Mechanotransduction. *Nat Commun* 11: 3282.  
820 <https://dx.doi.org/10.1038/s41467-020-17099-3>, PMID: 32612176.
- 821 Shen, H., S. Grimston, R. Civitelli, and S. Thomopoulos. 2015. Deletion of  
822 Connexin43 in Osteoblasts/Osteocytes Leads to Impaired Muscle Formation  
823 in Mice. *J Bone Miner Res* 30: 596-605. <https://dx.doi.org/10.1002/jbmr.2389>,  
824 PMID: 25348938.
- 825 Sinha, S., A. Sinha, P. Dongre, K. Kamat, and M. S. Inamdar. 2022. Organelle  
826 Dysfunction Upon Asrij Depletion Causes Aging-Like Changes in Mouse  
827 Hematopoietic Stem Cells. *Aging Cell* 21: e13570.  
828 <https://dx.doi.org/10.1111/accel.13570>, PMID: 35289070.  
829
- 830 Takayanagi, H., K. Ogasawara, S. Hida, T. Chiba, S. Murata, K. Sato, A. Takaoka, T.  
831 Yokochi, H. Oda, K. Tanaka, K. Nakamura, and T. Taniguchi. 2000. T-Cell-  
832 Mediated Regulation of Osteoclastogenesis by Signalling Cross-Talk between  
833 Rankl and Ifn-Gamma. *Nature* 408: 600-5.  
834 <https://dx.doi.org/10.1038/35046102>, PMID: 11117749.
- 835 Tchkonja, T., Y. Zhu, J. van Deursen, J. Campisi, and J. L. Kirkland. 2013. Cellular  
836 Senescence and the Senescent Secretory Phenotype: Therapeutic  
837 Opportunities. *J Clin Invest* 123: 966-72. <https://dx.doi.org/10.1172/JCI64098>,  
838 PMID: 23454759.



- 839 Tresguerres, F. G. F., J. Torres, J. Lopez-Quiles, G. Hernandez, J. A. Vega, and I. F.  
840 Tresguerres. 2020. The Osteocyte: A Multifunctional Cell within the Bone.  
841 *Ann Anat* 227: 151422. <https://dx.doi.org/10.1016/j.aanat.2019.151422>,  
842 PMID: 31563568.
- 843 van Bezooijen, R. L., P. ten Dijke, S. E. Papapoulos, and C. W. Lowik. 2005.  
844 Sost/Sclerostin, an Osteocyte-Derived Negative Regulator of Bone Formation.  
845 *Cytokine Growth Factor Rev* 16: 319-27.  
846 <https://dx.doi.org/10.1016/j.cytogfr.2005.02.005>, PMID: 15869900.
- 847 Wijshake, T., L. A. Malureanu, D. J. Baker, K. B. Jeganathan, B. van de Sluis, and J.  
848 M. van Deursen. 2012. Reduced Life- and Healthspan in Mice Carrying a  
849 Mono-Allelic *Bubr1 Mva* Mutation. *PLoS Genet* 8: e1003138.  
850 <https://dx.doi.org/10.1371/journal.pgen.1003138>, PMID: 23300461.
- 851 Woods, G. N., M. H. Huang, J. H. Lee, P. M. Cawthon, H. A. Fink, J. T. Schousboe,  
852 and D. M. Kado. 2020. Factors Associated with Kyphosis and Kyphosis  
853 Progression in Older Men: The Mros Study. *J Bone Miner Res* 35: 2193-2198.  
854 <https://dx.doi.org/10.1002/jbmr.4123>, PMID: 32615004.
- 855 Xiao, M., Y. Wang, C. Tao, Z. Wang, J. Yang, Z. Chen, Z. Zou, M. Li, A. Liu, C. Jia,  
856 B. Huang, B. Yan, P. Lai, C. Ding, D. Cai, G. Xiao, Y. Jiang, and X. Bai. 2017.  
857 Osteoblasts Support Megakaryopoiesis through Production of Interleukin-9.  
858 *Blood* 129: 3196-3209. <https://dx.doi.org/10.1182/blood-2016-11-749838>,  
859 PMID: 28450306.
- 860 Xiao, M., W. Zhang, W. Liu, L. Mao, J. Yang, L. Hu, S. Zhang, Y. Zheng, A. Liu, Q.  
861 Song, Y. Li, G. Xiao, Z. Zou, and X. Bai. 2021. Osteocytes Regulate  
862 Neutrophil Development through Il-19: A Potent Cytokine for Neutropenia  
863 Treatment. *Blood* 137: 3533-3547.  
864 <https://dx.doi.org/10.1182/blood.2020007731>, PMID: 33684929.
- 865 Xie, X., Q. Shi, P. Wu, X. Zhang, H. Kambara, J. Su, H. Yu, S. Y. Park, R. Guo, Q.  
866 Ren, S. Zhang, Y. Xu, L. E. Silberstein, T. Cheng, F. Ma, C. Li, and H. R. Luo.  
867 2020. Single-Cell Transcriptome Profiling Reveals Neutrophil Heterogeneity  
868 in Homeostasis and Infection. *Nat Immunol* 21: 1119-1133.  
869 <https://dx.doi.org/10.1038/s41590-020-0736-z>, PMID: 32719519.
- 870 Yu, V. W., and D. T. Scadden. 2016. Heterogeneity of the Bone Marrow Niche. *Curr*  
871 *Opin Hematol* 23: 331-8.  
872 <https://dx.doi.org/10.1097/MOH.0000000000000265>, PMID: 27177311.
- 873 Yu, W., L. Zhong, L. Yao, Y. Wei, T. Gui, Z. Li, H. Kim, N. Holdreith, X. Jiang, W.  
874 Tong, N. Dymont, X. S. Liu, S. Yang, Y. Choi, J. Ahn, and L. Qin. 2021. Bone  
875 Marrow Adipogenic Lineage Precursors Promote Osteoclastogenesis in Bone  
876 Remodeling and Pathologic Bone Loss. *J Clin Invest* 131.  
877 <https://dx.doi.org/10.1172/JCI140214>, PMID: 33206630.
- 878 Zhang, H., J. Li, J. Ren, S. Sun, S. Ma, W. Zhang, Y. Yu, Y. Cai, K. Yan, W. Li, B. Hu,  
879 P. Chan, G. G. Zhao, J. C. I. Belmonte, Q. Zhou, J. Qu, S. Wang, and G. H.  
880 Liu. 2021. Single-Nucleus Transcriptomic Landscape of Primate Hippocampal  
881 Aging. *Protein Cell* 12: 695-716. [https://dx.doi.org/10.1007/s13238-021-](https://dx.doi.org/10.1007/s13238-021-00852-9)  
882 [00852-9](https://dx.doi.org/10.1007/s13238-021-00852-9), PMID: 34052996.

883

884

885 **Figure and figure legend**

886

887

888 **Figure 1.** DTA<sup>het</sup> mice display partial osteocyte ablation. (A-B) Hematoxylin-eosin  
889 staining of WT and DTA<sup>het</sup> mice femur at 4 weeks (A) and quantification of the ratio  
890 of empty lacunae (arrows) (B) (n=8-12 per group), indicating reduced osteocyte  
891 number in DTA<sup>het</sup> mice. Scare bar, 20  $\mu$ m. (C-D) Immunofluorescence staining of  
892 femoral cortical bone of 4-week-old WT and DTA<sup>het</sup> mice (C) and quantification of  
893 dendrites per osteocyte based on the images (D) (n=152 osteocytes in WT group and  
894 n=64 osteocytes in DTA<sup>het</sup> group). Scare bar, 20  $\mu$ m. Error bar represents the standard  
895 deviation.

896

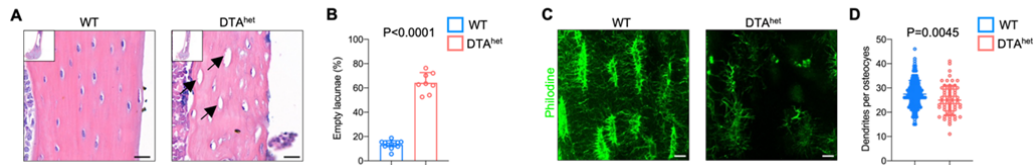

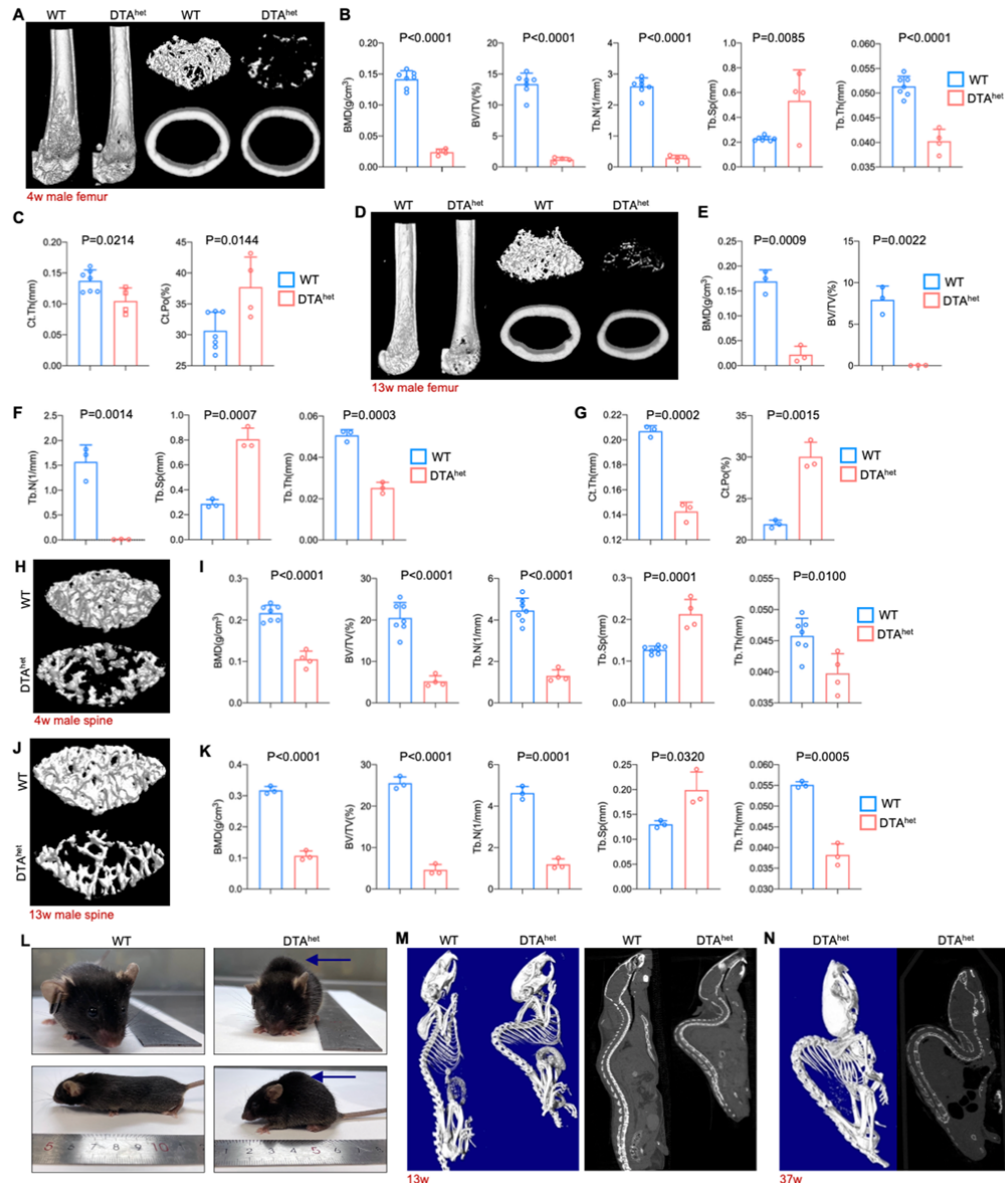

897

898

899 **Figure 2.** Osteocyte ablation induces severe osteoporosis and kyphosis. (A-C)  
 900 Representative  $\mu$ CT reconstructive images of male WT and DTA<sup>het</sup> mice femur at 4  
 901 weeks (A) and trabecular microstructural parameters (bone mineral density, BMD;  
 902 bone volume fraction, BV/TV; trabecular number, Tb.N; trabecular separation, Tb.Sp;  
 903 and trabecular thickness, Tb.Th); (B) and cortical microstructural parameters (cortical  
 904 thickness, Ct.Th; and cortical porosity, Ct.Po) (C) derived from  $\mu$ CT analysis (n=4-7  
 905 per group). (D-G) Representative  $\mu$ CT reconstructive images of male WT and DTA<sup>het</sup>  
 906 mice femur at 13 weeks (D) and trabecular microstructural parameters (BMD, BV/TV,  
 907 Tb.N, Tb.Sp and Tb.Th) (E-F) and cortical microstructural parameters (Ct.Th and  
 908 Ct.Po) (G) derived from  $\mu$ CT analysis (n=3 per group), demonstrating severe bone  
 909 loss in DTA<sup>het</sup> mice. (H-I) Representative  $\mu$ CT reconstructive images of male WT  
 910 and DTA<sup>het</sup> mice third lumbar at 4 weeks (H) and trabecular microstructural

911 parameters (BMD, BV/TV, Tb.N, Tb.Sp and Tb.Th) **(I)** derived from  $\mu$ CT analysis.  
912 **(J-K)** Representative  $\mu$ CT reconstructive images of male WT and DTA<sup>het</sup> mice third  
913 lumbar at 13 weeks **(J)** and trabecular microstructural parameters (BMD, BV/TV,  
914 Tb.N, Tb.Sp and Tb.Th) **(K)** derived from  $\mu$ CT analysis, showing vertebral body  
915 bone loss in the spine of DTA<sup>het</sup> mice. **(L)** Gross images of male WT and DTA<sup>het</sup> mice  
916 at 13 weeks. **(M)** Representative whole-body  $\mu$ CT reconstructive and sagittal images  
917 of male WT and DTA<sup>het</sup> mice at 13 weeks. **(N)** Representative whole-body  $\mu$ CT  
918 reconstructive and sagittal images of male DTA<sup>het</sup> mice at 37 weeks, noting that  
919 severe kyphosis occurred in DTA<sup>het</sup> mice. Error bar represents the standard deviation.  
920

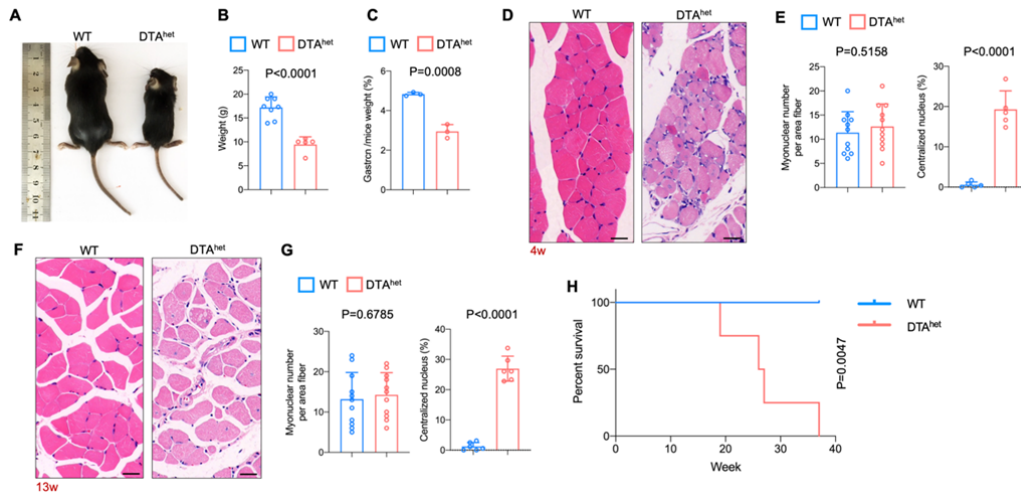

921  
922

**Figure 3.** Osteocyte ablation leads to severe sarcopenia and shorter lifespan. (**A-B**) Gross images (**A**) and weight (**B**) of male WT and DTA<sup>het</sup> mice at 4 weeks (n=5-8 per group). (**C**) The ratio of gastrocnemius muscle weight male WT and DTA<sup>het</sup> mice at 4 weeks (n=3 per group). (**D-E**) Hematoxylin-eosin staining of WT and DTA<sup>het</sup> mice gastrocnemius muscle at 4 weeks (**D**) and quantification of myonuclei per area fiber (n=11 per group) and centralized nucleus per field (**E**) (n=5 per group). Scale bar, 20 μm. Showing focal muscle atrophy, increased centralized myonuclei and mild inflammation in DTA<sup>het</sup> mice. (**F-G**) Hematoxylin-eosin staining of WT and DTA<sup>het</sup> mice gastrocnemius muscle at 13 weeks (**F**) and quantification of myonuclei per area fiber (n=11 per group) and centralized nucleus per field (**G**) (n=6 per group). Noting muscle atrophy, rimmed vacuoles and inclusion bodies within the muscle fibers in DTA<sup>het</sup> mice. Scale bar, 20 μm. (**H**) Kaplan-Meier survival curve of WT and DTA<sup>het</sup> mice (n=4-5 per group), showing that DTA<sup>het</sup> mice had shorter lifespan than that of wild type. Error bar represents the standard deviation.

936  
937



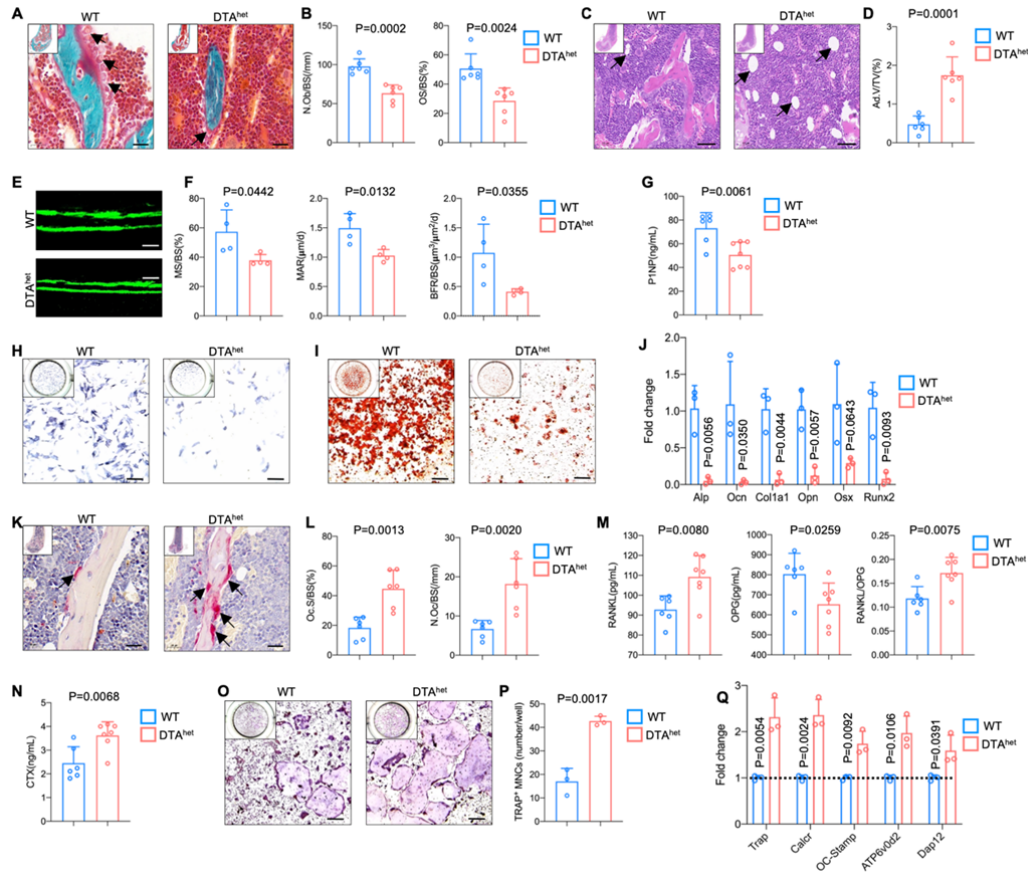

938

939

940 **Figure 4.** Ablation of osteocytes alters mesenchymal lineage commitment and  
 941 promoted osteoclastogenesis. (A-B) Goldner trichrome staining of male WT and  
 942 DTA<sup>het</sup> mice femur at 4 weeks (A) and histomorphometry analysis of osteoblast  
 943 numbers (N.Ob/BS) (arrows) and osteoid-covered surface (OS/BS) (B) (n=6 per  
 944 group). Scale bar, 20  $\mu$ m. (C-D) Hematoxylin-eosin staining of WT and DTA<sup>het</sup> mice  
 945 femur at 4 weeks (C) and histomorphometry analysis of adipocyte (arrows) volume  
 946 (Ad.V/TV) (D) (n=6 per group). Scale bar, 50  $\mu$ m. (E-F) Representative images of  
 947 calcein double labeling of the mineral layers of male WT and DTA<sup>het</sup> mice femur at 4  
 948 weeks (E) and histomorphometry analysis of the mineral surface (MS/BS), mineral  
 949 apposition rate (MAR) and bone formation rate (BFR/BS) (F) (n=4 per group). Scale  
 950 bar, 50  $\mu$ m. (G) ELISA of the concentration of bone formation index P1NP in the  
 951 serum (n=6-7 per group). (H-I) AlP staining (H) and alizarin red staining (I) after  
 952 osteoblast differentiation for 7 days and 21 days. Data are representative of three  
 953 independent experiments. Scale bar, 250  $\mu$ m. (J) RT-qPCR analysis of osteoblast  
 954 signature genes expression at the mRNA level after osteoblast differentiation for 7  
 955 days (n=3 per group from three independent experiments), indicating impaired  
 956 osteogenesis and increased adipogenesis in DTA<sup>het</sup> mice. (K-L) TRAP staining of WT  
 957 and DTA<sup>het</sup> mice femur at 4 weeks (K) and histomorphometry analysis of osteoclast  
 958 (arrows) surface (Oc.S/BS) and osteoclast numbers (N.Oc/BS) (L) (n=6 per group).  
 959 Scale bar, 20  $\mu$ m. (M) ELISAs of the concentration of RANKL, OPG and the ratio of

960 RANKL/OPG in the serum (n=6-7 per group). **(N)** ELISA of the concentration of  
961 bone resorption index CTX in the serum (n=6-7 per group). **(O-P)** TRAP staining of  
962 after osteoclast differentiation for 5 days **(O)** and quantitative analysis **(P)** of TRAP  
963 positive cells (nucleus > 3) per well (n=3 per group from three independent  
964 experiments). Scale bar, 250  $\mu$ m. **(Q)** RT-qPCR analysis of osteoclast signature genes  
965 expression at the mRNA level after osteoblast differentiation for 5 days (n=3 per  
966 group from three independent experiments), showing increased osteoclastogenesis in  
967 DTA<sup>het</sup> mice. Error bar represents the standard deviation.  
968

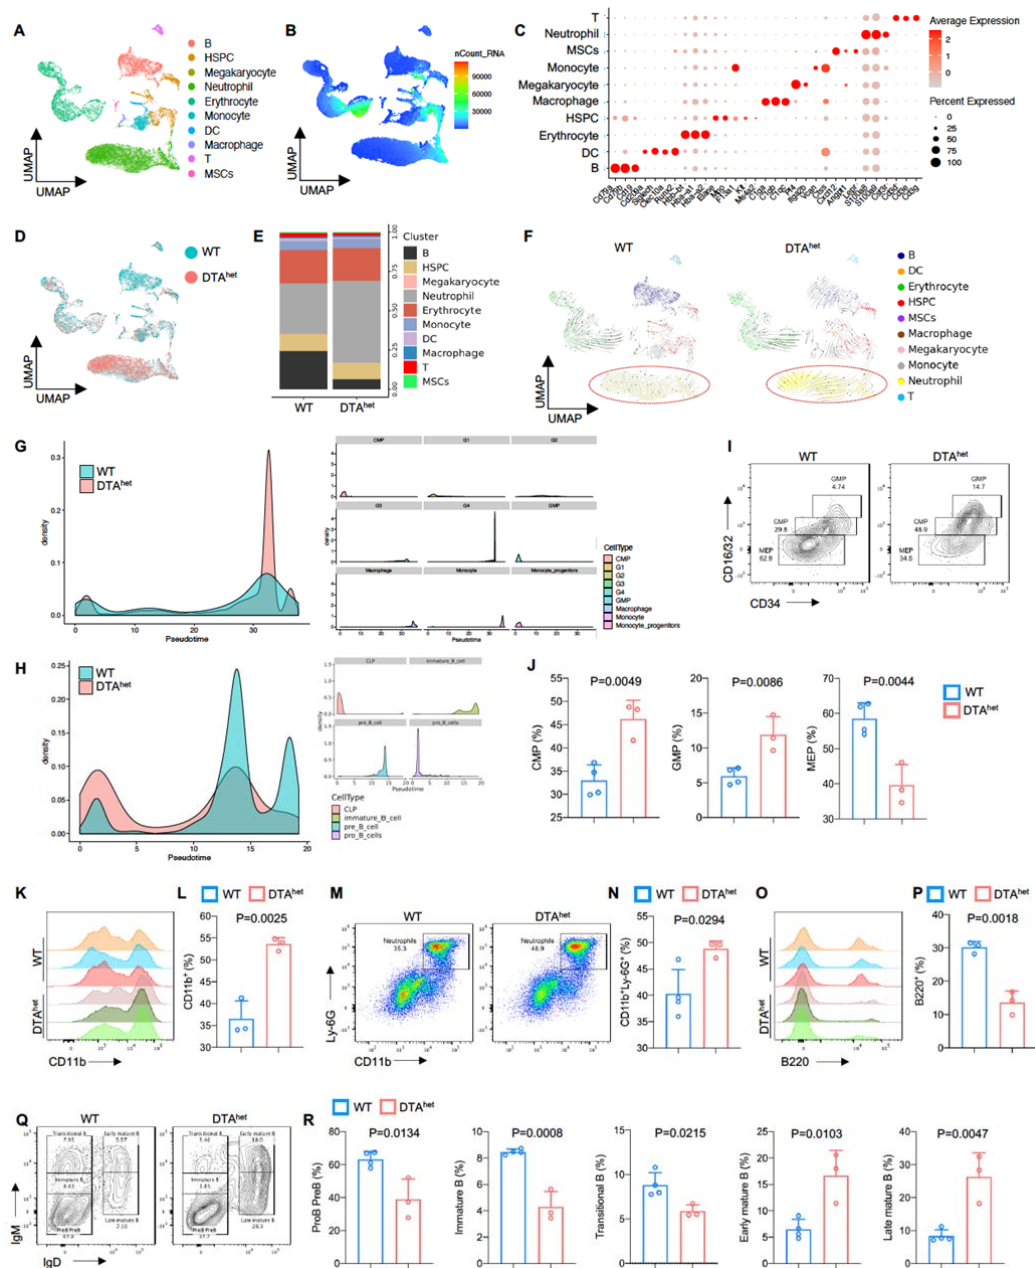

969

970

971

972

973

974

975

976

977

978

979

980

**Figure 5.** Alteration of hematopoietic lineage commitment by osteocyte ablation. (**A**-**B**) The UMAP plot of cells isolated from the bone marrow of 4 weeks WT and DTA<sup>het</sup> mice and inferred cluster identity (**A**) and number of mRNA per cell (**B**). (**C**) Dot plot showing the scaled expression of selected signature genes for each cluster. Dot size represents the percentage of cells in each cluster with more than one read of the corresponding gene and dots are colored by the average expression of each gene in each cluster. (**D**-**E**) The UMAP plot of cells shown by sample (**D**) and proportions of each cluster in two samples (**E**). (**F**) RNA velocity analysis of clusters of WT and DTA<sup>het</sup> mice shown by the UMAP embedding, showing stronger directionality of velocity vectors from HSPC cluster to neutrophil cluster in DTA<sup>het</sup> mice. (**G**)

981 Trajectory analysis of myeloid clusters of WT and DTA<sup>het</sup> mice, demonstrating  
982 myeloid-biased hematopoiesis in DTA<sup>het</sup> mice. **(H)** Trajectory analysis of lymphoid  
983 clusters of WT and DTA<sup>het</sup> mice, demonstrating impaired lymphopoiesis in DTA<sup>het</sup>  
984 mice. **(I-J)** Representative image of flow cytometry **(I)** and analysis of proportions of  
985 myeloid progenitors (CMP, GMP and MEP) **(J)** of 4 weeks WT and DTA<sup>het</sup> mice  
986 (n=3-4 per group). **(K-L)** Representative image of flow cytometry **(K)** and analysis of  
987 proportions of CD11b<sup>+</sup> myeloid cells **(L)** of 4 weeks WT and DTA<sup>het</sup> mice (n=3 per  
988 group). **(M-N)** Representative image of flow cytometry **(M)** and analysis of  
989 proportions of neutrophils **(N)** of 4 weeks WT and DTA<sup>het</sup> mice (n=3-4 per group).  
990 **(O-P)** Representative image of flow cytometry **(O)** and analysis of proportions of  
991 B220<sup>+</sup> lymphoid cells **(P)** of 4 weeks WT and DTA<sup>het</sup> mice (n=3 per group). **(Q-R)**  
992 Representative image of flow cytometry **(Q)** and analysis of proportions of ProB PreB,  
993 immature B, transitional B, early mature B and late mature B **(R)** of 4 weeks WT and  
994 DTA<sup>het</sup> mice (n=3-4 per group), indicating altered B cell development pattern in  
995 DTA<sup>het</sup> mice. Error bar represents the standard deviation.  
996

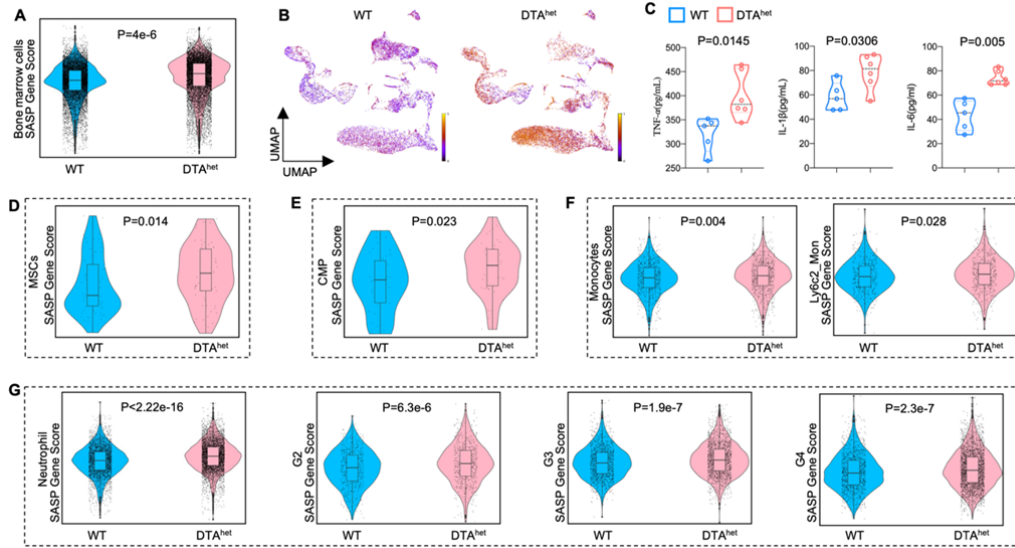

997  
 998  
 999  
 1000  
 1001  
 1002  
 1003  
 1004  
 1005  
 1006  
 1007  
 1008  
 1009  
 1010  
 1011

**Figure 6.** Organismal senescence of osteoprogenitors and myeloid lineage cells leads to the skeletal premature aging. **(A)** Comparisons of total bone marrow cells SASP score between 4 weeks WT and DTA<sup>het</sup> mice. **(B)** Latent time of RNA velocity analysis of WT and DTA<sup>het</sup> mice shown by the UMAP embedding. **(C)** ELISAs of the concentration of TNF- $\alpha$ , IL-1 $\beta$  and IL-6 of 4 weeks WT and DTA<sup>het</sup> mice in the serum (n=5-6 per group). **(D)** Comparisons of MSCs SASP score between 4 weeks WT and DTA<sup>het</sup> mice, indicating the senescence of osteoprogenitors in DTA<sup>het</sup> mice. **(E)** Comparisons of CMP SASP score between 4 weeks WT and DTA<sup>het</sup> mice. **(F)** Comparisons of monocytes and its subcluster Ly6c2<sup>+</sup> monocytes SASP score between 4 weeks WT and DTA<sup>het</sup> mice. **(G)** Comparisons of neutrophils and its subcluster (G2, G3 and G4) SASP score between 4 weeks WT and DTA<sup>het</sup> mice, indicating the senescence of myeloid lineage cells. Error bar represents the standard deviation.

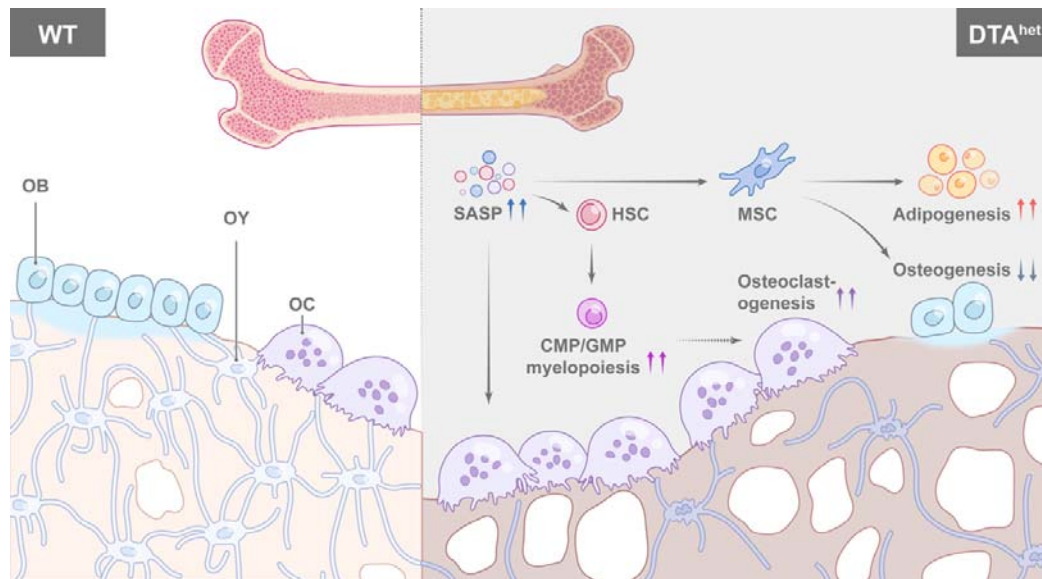

1012

1013

1014

**Figure 7.** Schematic diagram of osteocyte ablation induced skeletal senescence. Ablation of osteocytes induced SASP accumulation in bone marrow osteoprogenitors and myeloid lineage cells, which altered MSC and HSC lineage commitments with promoted adipogenesis, myelopoiesis and osteoclastogenesis at the expense of osteogenesis and lymphopoiesis, leading to the skeletal premature aging phenotype with severe sarcopenia, osteoporosis, degenerative kyphosis and bone marrow myelopoiesis, thus shortened lifespan of mice.

1020

1021



1022 **Supplementary figure legend**

1023 **Figure 2 - figure supplement 1 Osteocyte ablation had no impact on embryonic**  
1024 **skeletal development.** Whole mount skeleton staining of WT and DTA<sup>het</sup> mice at  
1025 E19.0 by Alizarin red/Alcian blue.

1026  
1027 **Figure 2 - figure supplement 2 Osteocyte ablation induced severe osteoporosis**  
1028 **and kyphosis.** A-C Representative  $\mu$ CT reconstructive images of female WT and  
1029 DTA<sup>het</sup> mice femur at 4 weeks (A) and trabecular microstructural parameters (BMD,  
1030 BV/TV, Tb.N, Tb.Sp and Tb.Th) (B) and cortical microstructural parameters (Ct.Th  
1031 and Ct.Po) (C) derived from  $\mu$ CT analysis (n=3-5 per group). D-E Representative  
1032  $\mu$ CT reconstructive images of female WT and DTA<sup>het</sup> mice third lumbar at 4 weeks  
1033 (D) and trabecular microstructural parameters (BMD, BV/TV, Tb.N, Tb.Sp and  
1034 Tb.Th) (E) derived from  $\mu$ CT analysis. Error bar represents the standard deviation.

1035  
1036 **Figure 2 - figure supplement 3 Osteocyte ablation induced severe osteoporosis**  
1037 **and kyphosis.** A Gait analysis of normal step sequence ratio of male WT and DTA<sup>het</sup>  
1038 mice at 4 weeks (n=6 per group). B-D Representative gait images and foot pattern of  
1039 male WT and DTA<sup>het</sup> mice (B) at 4 weeks and gait analysis of stride length and swing  
1040 speed of each paw (C and D). Error bar represents the standard deviation.

1041  
1042 **Figure 4 - figure supplement 1 Ablation of osteocytes alters mesenchymal lineage**  
1043 **commitment and promoted osteoclastogenesis.** A Selected osteogenesis related gene  
1044 ontology (GO) analysis of downregulated genes by osteocyte ablation. B Heatmap of  
1045 significantly differentiated genes (fold change > 2.0-fold, WT FPKM > 10, FDR <  
1046 0.05) (n=2 per group). C Indicated gene expression analysis of the cortical bones of  
1047 WT and DTA<sup>het</sup> mice (n=3 per group). Error bar represents the standard deviation.

1048  
1049 **Figure 5 - figure supplement 1 Flow cytometry gating strategy.** A Flow cytometry  
1050 of gating HSC (Lin<sup>-</sup>Sca1<sup>+</sup>c-Kit<sup>+</sup>), LT-HSC (Lin<sup>-</sup>Sca1<sup>+</sup>c-Kit<sup>+</sup>Flk2<sup>+</sup>), ST-HSC (Lin<sup>-</sup>  
1051 Sca1<sup>+</sup>c-Kit<sup>+</sup>Flk2<sup>+</sup>), CMP (Lin<sup>-</sup>Sca1<sup>+</sup>c-Kit<sup>+</sup>IL7R $\alpha$ <sup>-</sup>CD34<sup>+</sup>Fc $\gamma$  RII/III<sup>lo</sup>), GMP (Lin<sup>-</sup>  
1052 Sca1<sup>+</sup>c-Kit<sup>+</sup>IL7R $\alpha$ <sup>-</sup>CD34<sup>+</sup>Fc $\gamma$  RII/III<sup>hi</sup>), MEP (Lin<sup>-</sup>Sca1<sup>+</sup>c-Kit<sup>+</sup>IL7R $\alpha$ <sup>-</sup>CD34<sup>-</sup>  
1053 Fc $\gamma$  RII/III<sup>lo</sup>), cMoP (Lin<sup>-</sup>c-Kit<sup>+</sup>CD115<sup>+</sup>Ly-6C<sup>hi</sup>), CLP (Lin<sup>-</sup>IL7R $\alpha$ <sup>-</sup>Flk2<sup>+</sup>Sca1<sup>+</sup>c-Kit<sup>+</sup>),  
1054 ProB PreB (B220<sup>+</sup>CD24<sup>+</sup>IgM<sup>-</sup>IgD<sup>-</sup>), immature B (B220<sup>+</sup>CD24<sup>+</sup>IgM<sup>lo</sup>IgD<sup>-</sup>),  
1055 transitional B (B220<sup>+</sup>CD24<sup>+</sup>IgM<sup>+</sup>IgD<sup>-</sup>), early mature B (B220<sup>+</sup>CD24<sup>+</sup>IgM<sup>+</sup>IgD<sup>+</sup>) and  
1056 late mature B (B220<sup>+</sup>CD24<sup>+</sup>IgM<sup>lo/-</sup>IgD<sup>+</sup>). B Flow cytometry of gating neutrophil  
1057 (B220<sup>-</sup>CD11b<sup>+</sup>Ly-6G<sup>+</sup>) and monocyte (B220<sup>-</sup>Ly-6G<sup>-</sup>CD11b<sup>+</sup>Ly-6C<sup>+</sup>).

1058  
1059 **Figure 5 - figure supplement 2 Alteration of hematopoietic lineage commitment**  
1060 **by osteocyte ablation.** A-B Representative image of flow cytometry (A) and analysis  
1061 of proportions of HSC (B) of 4 weeks WT and DTA<sup>het</sup> mice (n=3-4 per group). C-D  
1062 Representative image of flow cytometry (C) and analysis of proportions of LT-HSC  
1063 and ST-HSC (D) of 4 weeks WT and DTA<sup>het</sup> mice (n=3-4 per group). E-F  
1064 Representative image of flow cytometry (E) and analysis of proportions of cMoP (F)  
1065 of 4 weeks WT and DTA<sup>het</sup> mice (n=3-4 per group). G-H Representative image of



1066 flow cytometry (G) and analysis of proportions of monocyte (H) of 4 weeks WT and  
1067 DTA<sup>het</sup> mice (n=3-4 per group). I-J Representative image of flow cytometry (I) and  
1068 analysis of proportions of CLP (J) of 4 weeks WT and DTA<sup>het</sup> mice (n=3-4 per group).  
1069 Error bar represents the standard deviation.

1070

1071 **Figure 5 - figure supplement 3 Increased granulopoiesis after osteocyte ablation.**

1072 A The UMAP plot of neutrophils of 4 weeks WT and DTA<sup>het</sup> mice and inferred  
1073 subcluster identity. B Dot plot showing the scaled expression of selected signature  
1074 genes for each cluster. Dot size represents the percentage of cells in each cluster with  
1075 more than one read of the corresponding gene and dot are colored by the average  
1076 expression of each gene in each cluster. C-D The UMAP plot of cells shown by  
1077 sample (C) and proportions of each subcluster in two samples (D). E-H Comparisons  
1078 of neutrophil activation score (E), chemotaxis score (F), glycolysis score (G) and  
1079 necroptosis score (H) between 4 weeks WT and DTA<sup>het</sup> mice.

1080

1081 **Figure 6 - figure supplement 1 Organismal senescence of osteoprogenitors and  
1082 myeloid lineage cells leads to the skeletal premature aging.**

1083 A RT-qPCR analysis of SASP related genes expression at the mRNA level of 4 weeks WT and DTA<sup>het</sup> mice  
1084 cortical bone. B RT-qPCR analysis of SASP related genes expression at the mRNA  
1085 level of 4 weeks WT and DTA<sup>het</sup> mice bone marrow. C Bar plot of GO analysis of  
1086 MSC cluster. D-E Bar plot of KEGG analysis of subcluster 2 and 4 of  
1087 Ly6c2\_monocytes. Error bar represents the standard deviation.

1088

1089

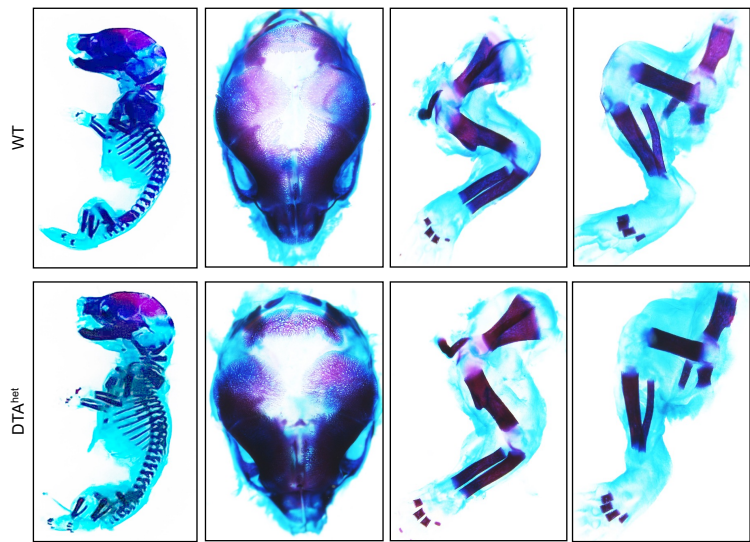

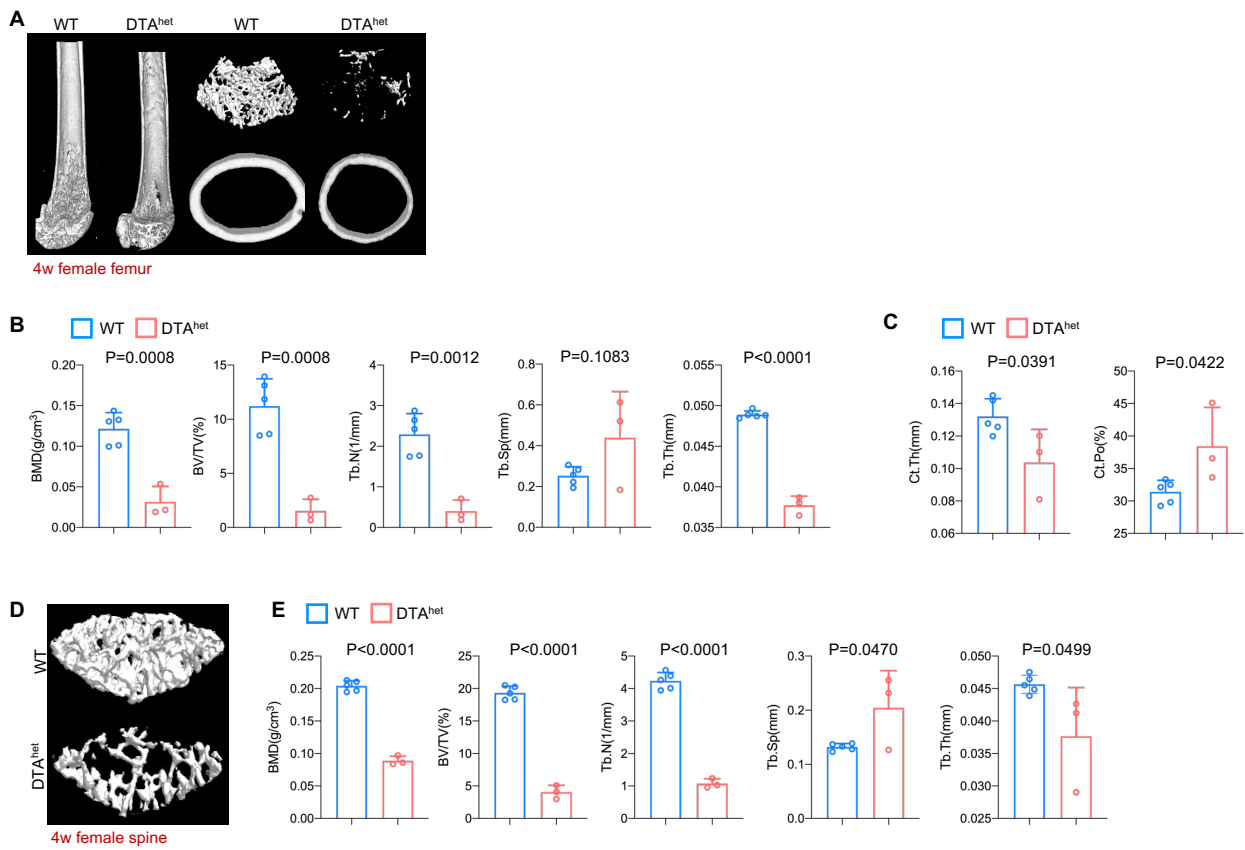

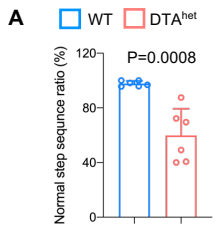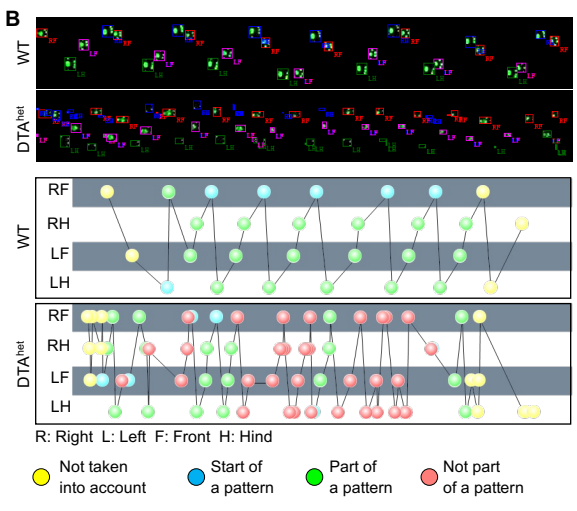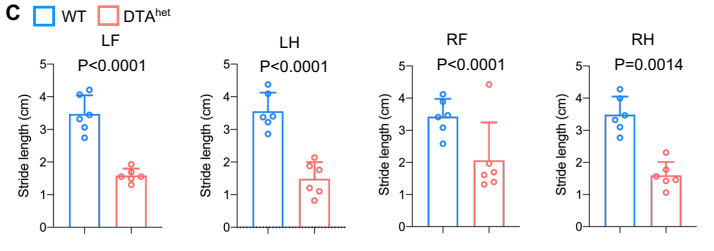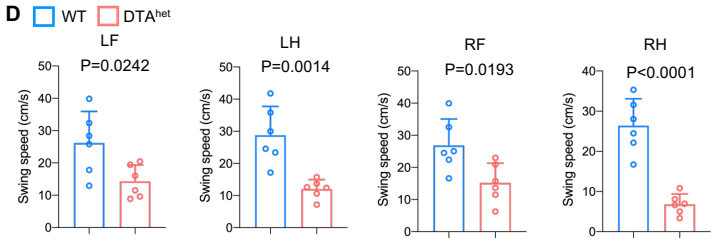

**A**

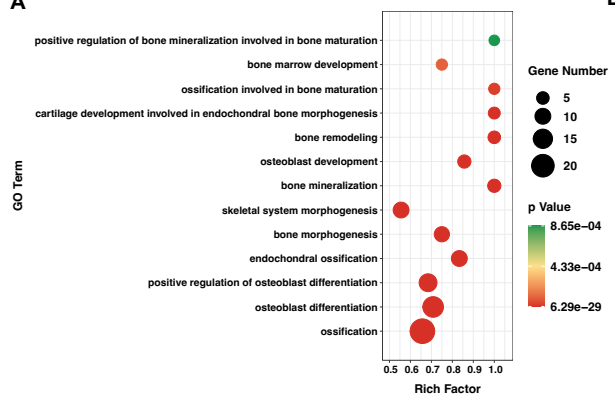

**B**

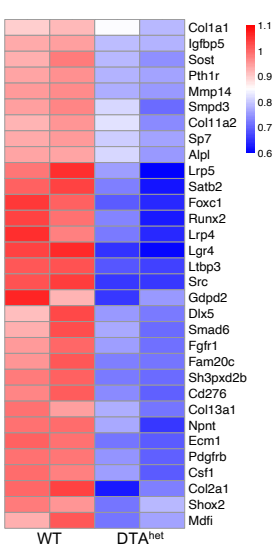

**C**

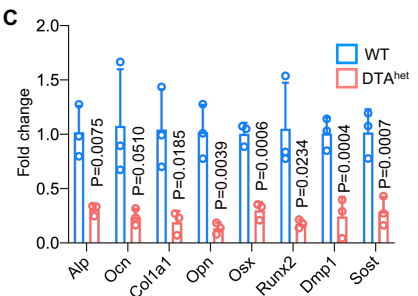

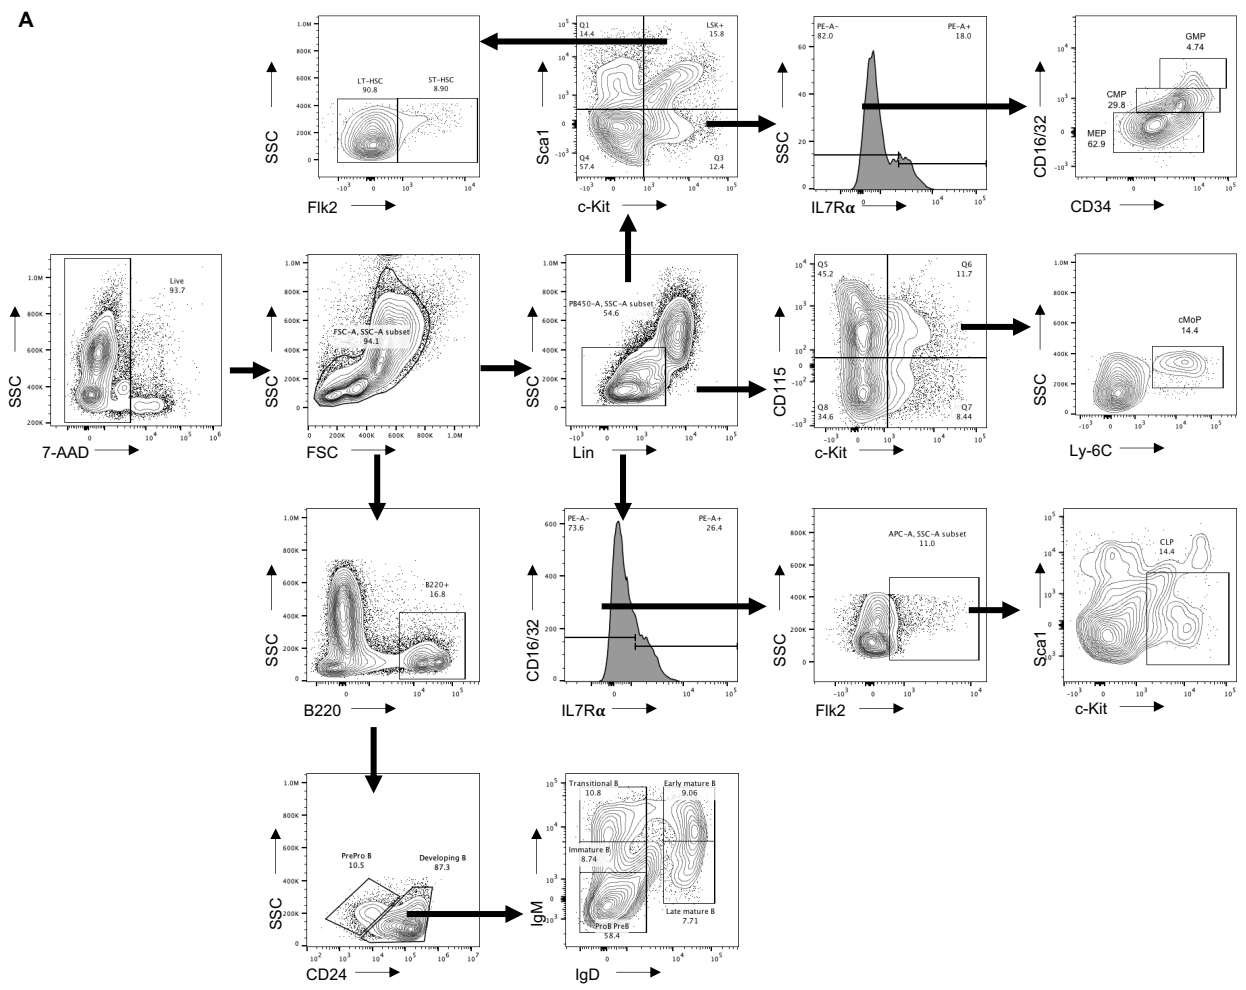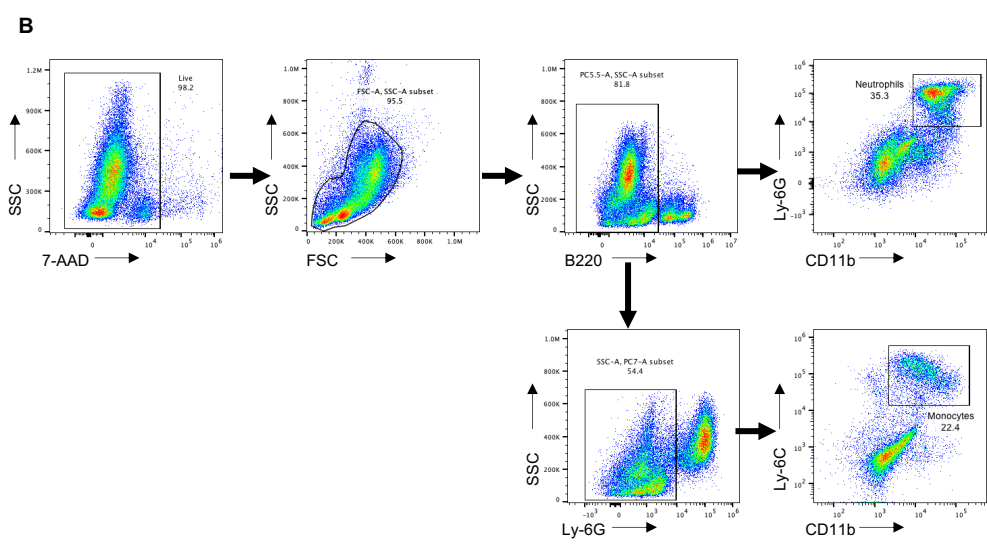



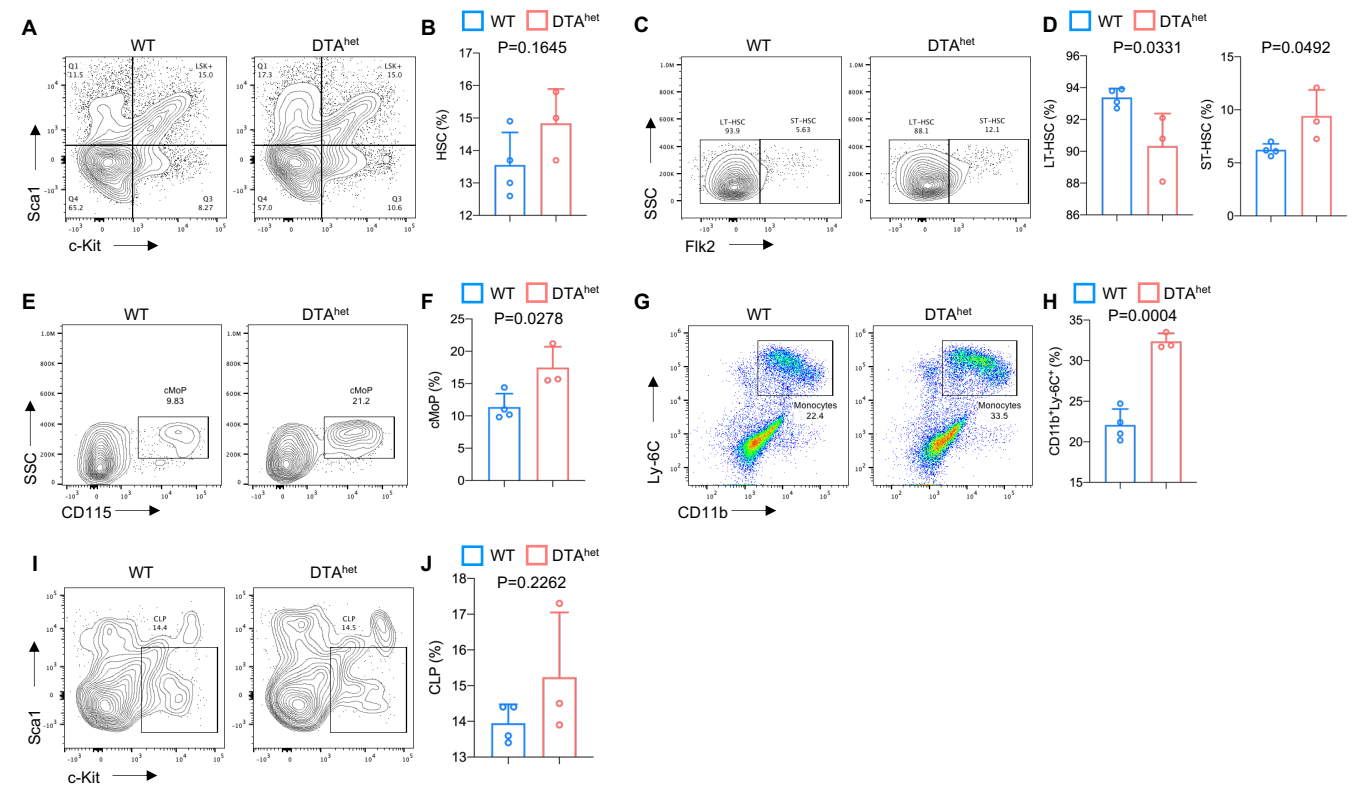

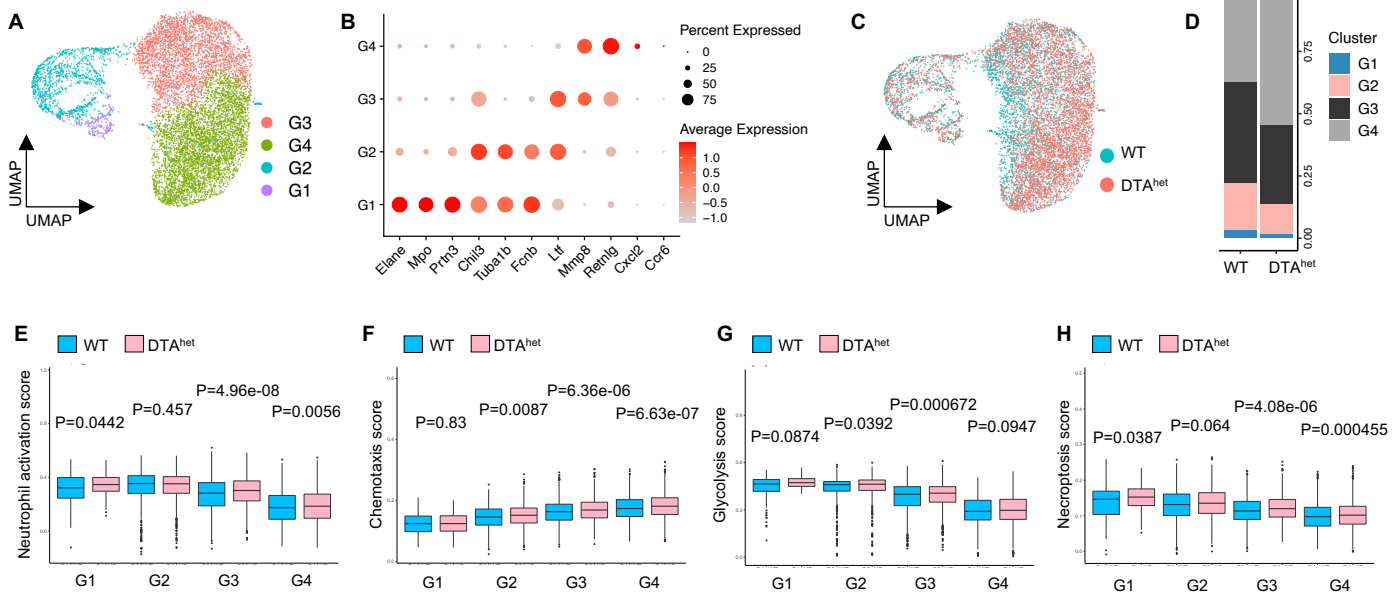

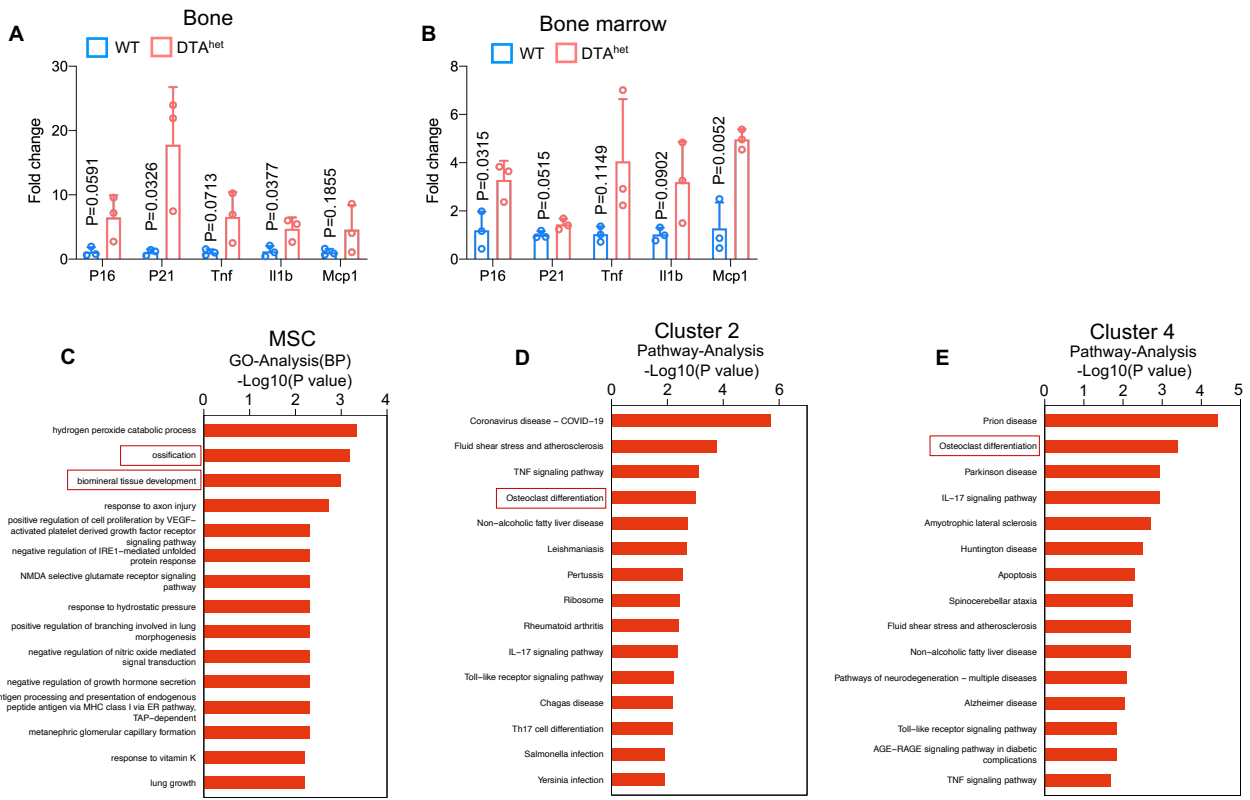

Source: https://www.biorxiv.org/content/biorxiv/early/2022/07/18/2022.07.17.500353.full.pdf
